# Supplementary material for: MicroRNAs associated to single drug components of R-CHOP identifies diffuse large B-cell lymphoma patients with poor outcome and adds prognostic value to the international prognostic index
Source: PubMed Central journal article supplement (PMC7082970; doi:10.1186/s12885-020-6643-8), 2020-03-20

# S2: MicroRNA associated to single drug components of R-CHOP identifies diffuse large B-cell lymphoma patients with poor outcome and adds prognostic value to the international prognostic index

*Hanne Due, Rasmus Froberg Brøndum, Ken H. Young, Martin Bøgsted, and Karen Dybkær*

*January 6th 2020*

## Load Libraries

```
library(affy)
library(limma)
library(knitr)
library(ggbiplot)
library(venn)
library(readxl)
library(tidyr)
library(sva)
library(survival)
library(survminer)
library(MASS)
library(randomForestSRC)
library(pec)
library(timeROC)
library(gridExtra)
library(VennDiagram)
library(devtools)
library(proclim)
```

```
session_info()
```

```
## - Session info -----
## setting value
## version R version 3.6.1 (2019-07-05)
## os      Windows 10 x64
## system  x86_64, mingw32
## ui      RTerm
## language (EN)
## collate Danish_Denmark.1252
## ctype   Danish_Denmark.1252
## tz      Europe/Paris
## date    2020-01-06
##
## - Packages -----
## ! package      * version   date      lib
## affy            * 1.63.0    2019-05-14 [1]
## affyio          1.55.0    2019-05-14 [1]
## annotate        1.63.0    2019-05-14 [1]
```

|    |                |            |            |     |
|----|----------------|------------|------------|-----|
| ## | AnnotationDbi  | 1.47.1     | 2019-08-20 | [1] |
| ## | assertthat     | 0.2.1      | 2019-03-21 | [1] |
| ## | backports      | 1.1.4      | 2019-04-10 | [1] |
| ## | Biobase        | * 2.45.0   | 2019-05-14 | [1] |
| ## | BiocGenerics   | * 0.31.5   | 2019-07-03 | [1] |
| ## | BiocManager    | 1.30.4     | 2018-11-13 | [1] |
| ## | BiocParallel   | * 1.19.0   | 2019-05-02 | [1] |
| ## | bit            | 1.1-14     | 2018-05-29 | [1] |
| ## | bit64          | 0.9-7      | 2017-05-08 | [1] |
| ## | bitops         | 1.0-6      | 2013-08-17 | [1] |
| ## | blob           | 1.2.0      | 2019-07-09 | [1] |
| ## | broom          | 0.5.2      | 2019-04-07 | [1] |
| ## | callr          | 3.3.1      | 2019-07-18 | [1] |
| ## | cellranger     | 1.1.0      | 2016-07-27 | [1] |
| ## | cli            | 1.1.0      | 2019-03-19 | [1] |
| ## | codetools      | 0.2-16     | 2018-12-24 | [1] |
| ## | colorspace     | 1.4-1      | 2019-03-18 | [1] |
| ## | crayon         | 1.3.4      | 2017-09-16 | [1] |
| ## | data.table     | 1.12.2     | 2019-04-07 | [1] |
| ## | DBI            | 1.0.0      | 2018-05-02 | [1] |
| ## | desc           | 1.2.0      | 2018-05-01 | [1] |
| ## | devtools       | * 2.1.0    | 2019-07-06 | [1] |
| ## | digest         | 0.6.20     | 2019-07-04 | [1] |
| ## | dplyr          | 0.8.3      | 2019-07-04 | [1] |
| ## | evaluate       | 0.14       | 2019-05-28 | [1] |
| ## | foreach        | 1.4.7      | 2019-07-27 | [1] |
| ## | formatR        | 1.7        | 2019-06-11 | [1] |
| ## | fs             | 1.3.1      | 2019-05-06 | [1] |
| ## | futile.logger  | * 1.4.3    | 2016-07-10 | [1] |
| ## | futile.options | 1.0.1      | 2018-04-20 | [1] |
| ## | genefilter     | * 1.67.1   | 2019-05-14 | [1] |
| ## | generics       | 0.0.2      | 2018-11-29 | [1] |
| ## | ggbiplot       | * 0.55     | 2018-08-31 | [1] |
| ## | ggplot2        | * 3.2.1    | 2019-08-10 | [1] |
| ## | ggpubr         | * 0.2.3    | 2019-09-03 | [1] |
| ## | ggsignif       | 0.6.0      | 2019-08-08 | [1] |
| ## | glue           | 1.3.1      | 2019-03-12 | [1] |
| ## | gridExtra      | * 2.3      | 2017-09-09 | [1] |
| ## | gtable         | 0.3.0      | 2019-03-25 | [1] |
| ## | htmltools      | 0.3.6      | 2017-04-28 | [1] |
| ## | IRanges        | 2.19.14    | 2019-08-25 | [1] |
| ## | iterators      | 1.0.12     | 2019-07-26 | [1] |
| ## | km.ci          | 0.5-2      | 2009-08-30 | [1] |
| ## | KMsurv         | 0.1-5      | 2012-12-03 | [1] |
| ## | knitr          | * 1.24     | 2019-08-08 | [1] |
| ## | lambda.r       | 1.2.3      | 2018-05-17 | [1] |
| ## | D lattice      | 0.20-38    | 2018-11-04 | [1] |
| ## | lava           | 1.6.6      | 2019-08-01 | [1] |
| ## | lazyeval       | 0.2.2      | 2019-03-15 | [1] |
| ## | limma          | * 3.41.15  | 2019-07-24 | [1] |
| ## | magrittr       | * 1.5      | 2014-11-22 | [1] |
| ## | MASS           | * 7.3-51.4 | 2019-03-31 | [1] |
| ## | D Matrix       | 1.2-17     | 2019-03-22 | [1] |
| ## | matrixStats    | 0.54.0     | 2018-07-23 | [1] |

```

## memoise 1.1.0 2017-04-21 [1]
## D mgcv * 1.8-28 2019-03-21 [1]
## munsell 0.5.0 2018-06-12 [1]
## mvtnorm 1.0-11 2019-06-19 [1]
## nlme * 3.1-141 2019-08-01 [1]
## numDeriv 2016.8-1.1 2019-06-06 [1]
## pec * 2018.07.26 2018-07-26 [1]
## pillar 1.4.2 2019-06-29 [1]
## pkgbuild 1.0.5 2019-08-26 [1]
## pkgconfig 2.0.2 2018-08-16 [1]
## pkgload 1.0.2 2018-10-29 [1]
## plyr * 1.8.4 2016-06-08 [1]
## preprocessCore 1.47.1 2019-05-14 [1]
## prettyunits 1.0.2 2015-07-13 [1]
## processx 3.4.1 2019-07-18 [1]
## prodlim * 2018.04.18 2018-04-18 [1]
## ps 1.3.0 2018-12-21 [1]
## purrr 0.3.3 2019-10-18 [1]
## R6 2.4.0 2019-02-14 [1]
## randomForestSRC * 2.9.1 2019-07-08 [1]
## Rcpp 1.0.2 2019-07-25 [1]
## RCurl 1.95-4.12 2019-03-04 [1]
## readxl * 1.3.1 2019-03-13 [1]
## remotes 2.1.0 2019-06-24 [1]
## rlang 0.4.1 2019-10-24 [1]
## rmarkdown 1.15 2019-08-21 [1]
## rprojroot 1.3-2 2018-01-03 [1]
## RSQLite 2.1.2 2019-07-24 [1]
## S4Vectors 0.23.19 2019-08-21 [1]
## scales * 1.0.0 2018-08-09 [1]
## sessioninfo 1.1.1 2018-11-05 [1]
## stringi 1.4.3 2019-03-12 [1]
## stringr 1.4.0 2019-02-10 [1]
## survival * 2.44-1.1 2019-04-01 [1]
## survminer * 0.4.6 2019-09-03 [1]
## survMisc 0.5.5 2018-07-05 [1]
## sva * 3.33.1 2019-05-22 [1]
## testthat 2.2.1 2019-07-25 [1]
## tibble 2.1.3 2019-06-06 [1]
## tidyr * 0.8.3 2019-03-01 [1]
## tidyselect 0.2.5 2018-10-11 [1]
## timereg 1.9.4 2019-07-30 [1]
## timerOC * 0.3 2015-03-25 [1]
## usethis * 1.5.1 2019-07-04 [1]
## vctrs 0.2.0 2019-07-05 [1]
## venn * 1.7 2018-07-31 [1]
## VennDiagram * 1.6.20 2018-03-28 [1]
## withr 2.1.2 2018-03-15 [1]
## xfun 0.9 2019-08-21 [1]
## XML 3.98-1.20 2019-06-06 [1]
## xtable 1.8-4 2019-04-21 [1]
## yaml 2.2.0 2018-07-25 [1]
## zeallot 0.1.0 2018-01-28 [1]
## zlibbioc 1.31.0 2019-05-14 [1]

```





```
## CRAN (R 3.6.0)
## CRAN (R 3.6.0)
## CRAN (R 3.6.0)
## CRAN (R 3.6.1)
## Bioconductor
## CRAN (R 3.6.0)
##
## [1] C:/Users/y12c/Documents/R/win-library/3.6
## [2] C:/Program Files/R/R-3.6.1/library
##
## D -- DLL MD5 mismatch, broken installation.
```

Set GGPLOT2 colors

```
#options(
# ggplot2.continuous.colour = "viridis",
# ggplot2.continuous.fill = "viridis"
#)
```

Custom functions

```
microarrayScale <- function(x, center = "median", scale = "sd") {
  if (class(x) == "ExpressionSet") {
    x.m <- affy::exprs(x)
  } else {
    x.m <- x
  }

  if(center == "median") {
    x.m <- x.m - matrixStats::rowMedians(x.m, na.rm = TRUE)
  }
  if(center == "mean") {
    x.m <- x.m - rowMeans(x.m, na.rm = TRUE)
  }
  if (scale == "sd") {
    x.m <- x.m / rowSds(x.m, na.rm = TRUE)
  }
  if (class(x) == "ExpressionSet") {
    Biobase::exprs(x) <- x.m
  } else {
    x <- x.m
  }

  return(x)
}

cutFun <- function(x) {
  cut(x,
  breaks=c(-Inf, quantile(x, c(1/3, 2/3), na.rm = TRUE), Inf),
  labels = c("Low", "Medium", "High"))
}
```

# Differential Expression Analysis

Load CEL files

```
cel.files <- just.rma(list.files("../ExternalData/Cell lines/CEL/All/", full.names = TRUE))
```

```
## Warning in just.rma(list.files("../ExternalData/Cell lines/CEL/All/", full.names = TRUE)): Incompati
```

```
## Warning: replacing previous import 'AnnotationDbi::tail' by 'utils::tail'
```

```
## when loading 'mirna102xgaincdf'
```

```
## Warning: replacing previous import 'AnnotationDbi::head' by 'utils::head'
```

```
## when loading 'mirna102xgaincdf'
```

```
##
```

```
cel.files
```

```
## ExpressionSet (storageMode: lockedEnvironment)
```

```
## assayData: 7815 features, 15 samples
```

```
## element names: exprs, se.exprs
```

```
## protocolData
```

```
## sampleNames: DB_(miRNA-1_0_2Xgain).CEL
```

```
## FARAGE_M_(miRNA-1_0_2Xgain).CEL ...
```

```
## U2932_M_(miRNA-1_0_2Xgain).CEL (15 total)
```

```
## varLabels: ScanDate
```

```
## varMetadata: labelDescription
```

```
## phenoData
```

```
## sampleNames: DB_(miRNA-1_0_2Xgain).CEL
```

```
## FARAGE_M_(miRNA-1_0_2Xgain).CEL ...
```

```
## U2932_M_(miRNA-1_0_2Xgain).CEL (15 total)
```

```
## varLabels: sample
```

```
## varMetadata: labelDescription
```

```
## featureData: none
```

```
## experimentData: use 'experimentData(object)'
```

```
## Annotation: mirna102xgain
```

Extract expression matrix and rename samples

```
#Expression
```

```
expr <- exprs(cel.files)
```

```
#Select human miRNAs
```

```
hsa.miRNA <- expr[grep("hsa-", rownames(expr)), ]
```

```
nrow(hsa.miRNA)
```

```
## [1] 847
```

```
colnames(hsa.miRNA) <- sapply(strsplit(colnames(hsa.miRNA), "_"), function(x) x[1])
```

```
colnames(hsa.miRNA)
```

```
## [1] "DB" "FARAGE" "HBL-1" "MC-116" "NU-DHL-1" "NU-DUL-1"
```

```
## [7] "OCI-Ly19" "OCI-Ly3" "OCI-Ly7" "OCI-Ly8" "RIVA" "SU-DHL-4"
```

```
## [13] "SU-DHL-5" "SU-DHL-8" "U2932"
```

Load resistance classes

```
hsa.meta <- read.table("../ExternalData/Cell lines/Meta-data/Cell_line_division.csv",  
 sep = ";", header = TRUE)
```

```
kable(hsa.meta)
```

| Cell_line | kit | VIN | RTX | DOX | CYC |
|-----------|-----|-----|-----|-----|-----|
| OCI-Ly19  | 1   | S   | R   | S   | S   |
| FARAGE    | 1   | S   | I   | S   | R   |
| SU-DHL-5  | 2   | S   | S   | S   | S   |
| MC-116    | 2   | NA  | NA  | I   | NA  |
| OCI-Ly3   | 1   | I   | R   | I   | I   |
| HBL-1     | 2   | I   | R   | I   | I   |
| U2932     | 1   | I   | I   | R   | R   |
| NU-DUL-1  | 2   | I   | S   | I   | S   |
| RIVA      | 1   | R   | I   | R   | R   |
| OCI-Ly7   | 1   | R   | S   | R   | I   |
| SU-DHL-8  | 2   | R   | R   | S   | I   |
| DB        | 1   | R   | I   | R   | R   |
| SU-DHL-4  | 2   | NA  | S   | R   | NA  |
| NU-DHL-1  | 1   | NA  | I   | S   | S   |
| OCI-Ly8   | 1   | NA  | R   | NA  | NA  |

PCA and plot to check for batch effects

```

hsa.mirNA.pca <- prcomp(t(expr))
kit <- as.factor(hsa.meta$kit[order(hsa.meta$Cell_line)])

ggbiplot(hsa.mirNA.pca,
  obs.scale = 1,
  var.scale = 1,
  ellipse = T,
  var.axes = FALSE,
  choices = 1:2,
  groups = kit)

```



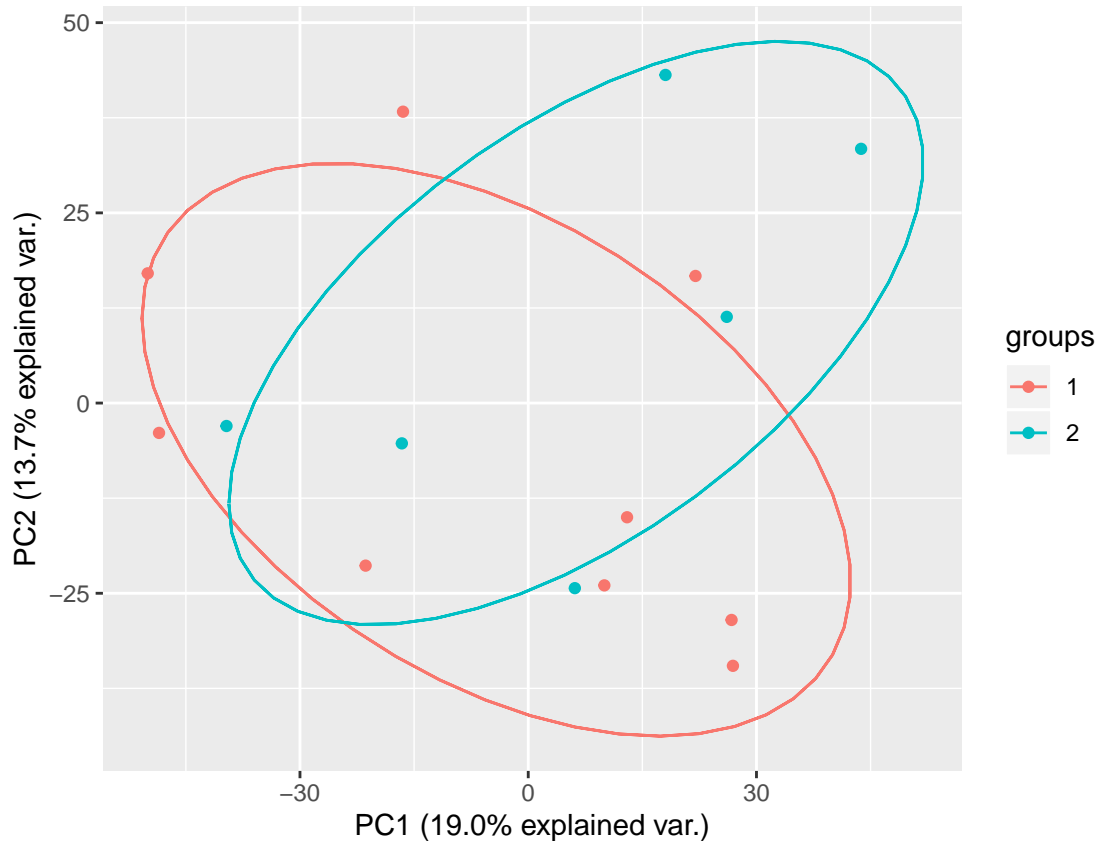

## Vincristine

Extract subset for Vincristine

```
vinClass <- subset(hsa.meta, VIN %in% c("S", "R"), select = c("Cell_line", "kit", "VIN"))
vinClass
```

```
##   Cell_line kit VIN
## 1   OCI-Ly19  1  S
## 2   FARAGE  1  S
## 3   SU-DHL-5  2  S
## 9     RIVA  1  R
## 10  OCI-Ly7  1  R
## 11  SU-DHL-8  2  R
## 12     DB   1  R
```

Perform DE analysis for Vincristine Resistance

```
vinModel <- model.matrix(~ (VIN=="R")+kit, vinClass)
vinFit <- lmFit(hsa.miRNA[, vinClass$Cell_line], vinModel)
vinFit.eb <- eBayes(vinFit)
vinResults <- topTable(vinFit.eb, coef = 2, number = 1000)
vinResults <- subset(vinResults, logFC > 2 | logFC < -2)
round(vinResults, 3)
```

```
##           logFC AveExpr      t P.Value adj.P.Val      B
## hsa-miR-21_st -3.217  4.197 -3.414  0.014   0.949 -4.429
```

```
## hsa-miR-21-star_st -2.282 4.204 -3.371 0.015 0.949 -4.431
## hsa-miR-155_st -3.953 10.245 -2.566 0.043 0.949 -4.474
## hsa-miR-886-3p_st -2.322 3.868 -2.281 0.063 0.949 -4.493
## hsa-miR-27a_st -2.083 6.606 -1.839 0.116 0.949 -4.527
## hsa-miR-34a_st -3.147 3.558 -1.658 0.149 0.949 -4.542
## hsa-miR-886-5p_st -2.032 4.061 -1.627 0.155 0.949 -4.545
## hsa-let-7b_st -2.346 9.878 -1.591 0.163 0.949 -4.548
## hsa-miR-148a_st -2.603 4.726 -1.551 0.172 0.949 -4.551
## hsa-miR-222_st -3.859 5.283 -1.209 0.272 0.949 -4.580
## hsa-miR-146a_st -2.109 9.790 -1.127 0.303 0.949 -4.587
## hsa-miR-221_st -2.819 5.788 -1.004 0.354 0.949 -4.597
## hsa-miR-708_st -2.094 4.135 -0.976 0.367 0.949 -4.599
```

## Rituximab

Extract subset for Rituximab

```
rtxCClass <- subset(hsa.meta, RTX %in% c("S", "R"), select = c("Cell_line", "kit", "RTX"))
rtxCClass
```

```
## Cell_line kit RTX
## 1 OCI-Ly19 1 R
## 3 SU-DHL-5 2 S
## 5 OCI-Ly3 1 R
## 6 HBL-1 2 R
## 8 NU-DUL-1 2 S
## 10 OCI-Ly7 1 S
## 11 SU-DHL-8 2 R
## 13 SU-DHL-4 2 S
## 15 OCI-Ly8 1 R
```

Perform DE analysis for Rituximab Resistance

```
rtxModel <- model.matrix(~ (RTX=="R")+kit, rtxClass)
rtxFit <- lmFit(hsa.miRNA[, rtxClass$Cell_line], rtxModel)
rtxFit.eb <- eBayes(rtxFit)
rtxResults <- topTable(rtxFit.eb, coef = 2, number = 1000)
rtxResults <- subset(rtxResults, logFC > 2 | logFC < -2)
round(rtxResults, 3)
```

```
## logFC AveExpr t P.Value adj.P.Val B
## hsa-miR-193b_st -4.037 7.624 -3.915 0.004 0.995 -4.345
## hsa-miR-193b-star_st -3.765 4.193 -3.835 0.005 0.995 -4.349
## hsa-miR-151-5p_st -2.737 9.110 -3.106 0.014 0.995 -4.398
## hsa-miR-138_st -4.166 6.176 -3.073 0.015 0.995 -4.400
## hsa-miR-9-star_st 2.442 2.590 3.016 0.016 0.995 -4.405
## hsa-miR-183_st 2.526 5.651 3.008 0.016 0.995 -4.405
## hsa-miR-151-3p_st -2.468 6.288 -2.635 0.029 0.995 -4.437
## hsa-miR-30a_st 2.787 4.874 2.434 0.040 0.995 -4.455
## hsa-miR-1303_st -2.538 2.775 -2.417 0.041 0.995 -4.457
## hsa-miR-222_st 6.128 6.747 2.336 0.047 0.995 -4.464
## hsa-miR-503_st 2.518 3.586 2.300 0.049 0.995 -4.468
## hsa-miR-629-star_st -2.252 3.931 -2.168 0.061 0.995 -4.481
## hsa-miR-27b_st 2.295 5.771 2.155 0.062 0.995 -4.482
## hsa-miR-155_st 3.043 10.724 1.965 0.084 0.995 -4.501
```

```
## hsa-miR-221_st      5.053  6.674  1.887  0.094  0.995 -4.509
## hsa-miR-424-star_st 2.293  3.464  1.858  0.099  0.995 -4.512
## hsa-miR-30a-star_st 2.039  1.707  1.795  0.109  0.995 -4.519
## hsa-miR-551b_st    2.399  2.332  1.782  0.111  0.995 -4.520
## hsa-miR-345_st     2.866  4.784  1.723  0.122  0.995 -4.526
## hsa-miR-886-3p_st  2.060  3.926  1.354  0.211  0.995 -4.564
## hsa-miR-708_st     2.108  4.108  1.156  0.280  0.995 -4.583
## hsa-miR-125b_st    2.598  4.129  1.049  0.324  0.995 -4.593
## hsa-miR-886-5p_st  2.070  4.041  0.988  0.351  0.997 -4.598
## hsa-miR-99a_st     2.121  3.714  0.905  0.391  0.997 -4.605
```

## Doxorubicin

Extract subset for Doxorubicin

```
doxClass <- subset(hsa.meta, DOX %in% c("S", "R"), select = c("Cell_line", "kit", "DOX"))
doxClass
```

```
##   Cell_line kit DOX
## 1   OCI-Ly19  1  S
## 2   FARAGE   1  S
## 3   SU-DHL-5  2  S
## 7     U2932  1  R
## 9     RIVA   1  R
## 10  OCI-Ly7  1  R
## 11  SU-DHL-8  2  S
## 12     DB    1  R
## 13  SU-DHL-4  2  R
## 14  NU-DHL-1  1  S
```

Perform DE analysis for Doxorubicin Resistance

```
doxModel <- model.matrix(~ (DOX=="R")+kit, doxClass)
doxFit <- lmFit(hsa.miRNA[, doxClass$Cell_line], doxModel)
doxFit.eb <- eBayes(doxFit)
doxResults <- topTable(doxFit.eb, coef = 2, number = 1000)
doxResults <- subset(doxResults, logFC > 2 | logFC < -2)
round(doxResults, 3)
```

```
##           logFC AveExpr      t P.Value adj.P.Val      B
## hsa-miR-27a_st -2.848  6.522 -3.529  0.006  0.955 -4.291
## hsa-miR-23a_st -2.604  9.105 -3.117  0.012  0.955 -4.332
## hsa-miR-221_st -5.511  6.382 -2.953  0.016  0.955 -4.349
## hsa-miR-222_st -6.373  6.110 -2.868  0.018  0.955 -4.359
## hsa-miR-129-5p_st 2.009  2.524  2.751  0.022  0.955 -4.373
## hsa-miR-1295_st 2.241  2.367  2.596  0.029  0.955 -4.391
## hsa-miR-34a_st -3.281  3.920 -2.130  0.062  0.955 -4.451
## hsa-miR-125a-5p_st 2.477  3.493  2.067  0.068  0.955 -4.460
## hsa-miR-708_st -2.798  4.150 -1.920  0.086  0.955 -4.479
## hsa-miR-193b-star_st 2.192  4.766  1.660  0.131  0.955 -4.515
## hsa-miR-200c_st -2.626  5.557 -1.636  0.136  0.955 -4.518
## hsa-miR-181a-2-star_st 2.467  4.282  1.526  0.161  0.955 -4.533
## hsa-miR-155_st -2.172 10.326 -1.516  0.163  0.955 -4.534
```

## Cyclophosphamide

Extract subset for Cyclophosphamide

```
cycClass <- subset(hsa.meta, CYC %in% c("S", "R"), select = c("Cell_line", "kit", "CYC"))
cycClass
```

```
##   Cell_line kit CYC
## 1  OCI-Ly19  1  S
## 2   FARAGE  1  R
## 3  SU-DHL-5  2  S
## 7   U2932  1  R
## 8  NU-DUL-1  2  S
## 9   RIVA  1  R
## 12    DB  1  R
## 14  NU-DHL-1  1  S
```

Perform DE analysis for Cyclophosphamide Resistance

```
cycModel <- model.matrix(~ (CYC=="R")+kit, cycClass)
cycFit <- lmFit(hsa.miRNA[, cycClass$Cell_line], cycModel)
cycFit.eb <- eBayes(cycFit)
cycResults <- topTable(cycFit.eb, coef = 2, number = 1000)
cycResults <- subset(cycResults, logFC > 2 | logFC < -2)
round(cycResults, 3)
```

| ## |                      | logFC  | AveExpr | t      | P.Value | adj.P.Val | B      |
|----|----------------------|--------|---------|--------|---------|-----------|--------|
| ## | hsa-miR-486-5p_st    | -4.419 | 4.465   | -7.287 | 0.000   | 0.075     | 0.976  |
| ## | hsa-miR-486-3p_st    | -2.306 | 2.473   | -7.081 | 0.000   | 0.075     | 0.853  |
| ## | hsa-miR-708_st       | -6.073 | 4.649   | -6.339 | 0.000   | 0.101     | 0.368  |
| ## | hsa-miR-30a_st       | 2.492  | 3.816   | 2.717  | 0.029   | 0.918     | -3.300 |
| ## | hsa-miR-151-3p_st    | -2.236 | 5.757   | -2.315 | 0.053   | 0.957     | -3.829 |
| ## | hsa-miR-664-star_st  | 2.152  | 3.392   | 2.160  | 0.067   | 0.957     | -4.033 |
| ## | hsa-miR-152_st       | 2.024  | 4.543   | 2.095  | 0.074   | 0.957     | -4.118 |
| ## | hsa-miR-99b_st       | 2.397  | 2.209   | 2.001  | 0.085   | 0.957     | -4.240 |
| ## | hsa-miR-148a-star_st | 2.321  | 2.688   | 1.890  | 0.100   | 0.957     | -4.383 |
| ## | hsa-miR-146a_st      | 4.703  | 9.475   | 1.863  | 0.104   | 0.957     | -4.417 |
| ## | hsa-miR-193b-star_st | 2.552  | 4.381   | 1.831  | 0.109   | 0.957     | -4.458 |
| ## | hsa-miR-221_st       | -5.315 | 7.620   | -1.829 | 0.109   | 0.957     | -4.460 |
| ## | hsa-miR-148a_st      | 2.946  | 5.477   | 1.729  | 0.127   | 0.957     | -4.586 |
| ## | hsa-miR-222_st       | -5.986 | 7.443   | -1.724 | 0.127   | 0.957     | -4.592 |
| ## | hsa-miR-138_st       | -3.663 | 6.356   | -1.667 | 0.138   | 0.957     | -4.662 |
| ## | hsa-miR-551b_st      | 2.351  | 2.460   | 1.485  | 0.180   | 0.971     | -4.881 |
| ## | hsa-miR-151-5p_st    | -2.710 | 7.973   | -1.351 | 0.218   | 0.984     | -5.034 |

Dump DE results

```
write.csv2(vinResults, file = "../Output/vinResults.csv")
write.csv2(rtxResults, file = "../Output/rtxResults.csv")
write.csv2(doxResults, file = "../Output/doxResults.csv")
write.csv2(cycResults, file = "../Output/cycResults.csv")
```

## Match MIRs to u133+2 probes

Make list with selected MIRs from DE analysis

```
vennResults <- list("Vincristine" = rownames(vinResults),
                   "Rituximab"   = rownames(rtxResults),
                   "Doxorubicin" = rownames(doxResults),
                   "Cyclophosphamide" = rownames(cycResults))
```

Function to rename MIRS to match u133+2 array

```
renameMir <- function(x){
  x <- sub("hsa-", "", x)
  x <- sub("_st", "", x)
  x <- sub("-", "", x)
  x <- toupper(x)
  x[x == "LET7B"] <- "hsa-let-7b"
  return(x)
}
```

Combined list of DE genes

```
comb.de.genes <- data.frame("deMIR" = unique(unlist(vennResults)))
comb.de.genes$miRNA <- renameMir(comb.de.genes$deMIR)
comb.de.genes$miRNA
```

```
## [1] "MIR21"          "MIR21-STAR"      "MIR155"          "MIR886-3P"
## [5] "MIR27A"         "MIR34A"          "MIR886-5P"      "hsa-let-7b"
## [9] "MIR148A"        "MIR222"          "MIR146A"        "MIR221"
## [13] "MIR708"         "MIR193B"         "MIR193B-STAR"   "MIR151-5P"
## [17] "MIR138"         "MIR9-STAR"       "MIR183"          "MIR151-3P"
## [21] "MIR30A"         "MIR1303"         "MIR503"          "MIR629-STAR"
## [25] "MIR27B"         "MIR424-STAR"     "MIR30A-STAR"    "MIR551B"
## [29] "MIR345"         "MIR125B"         "MIR99A"          "MIR23A"
## [33] "MIR129-5P"      "MIR1295"         "MIR125A-5P"     "MIR200C"
## [37] "MIR181A-2-STAR" "MIR486-5P"       "MIR486-3P"      "MIR664-STAR"
## [41] "MIR152"         "MIR99B"          "MIR148A-STAR"
```

Match MIRs to u133+2 probes

```
MIRu133 <- read_xlsx("../ExternalData/Cell lines/Meta-data/miRNAs_U133.xlsx", sheet = 1)
MIRu133 <- separate(MIRu133, "miRNA", sep = " /// ", into=letters[1:7])
```

```
## Warning: Expected 7 pieces. Missing pieces filled with `NA` in 298 rows [1,
## 2, 3, 4, 5, 6, 7, 8, 9, 10, 11, 12, 13, 14, 15, 16, 17, 18, 19, 20, ...].
```

```
comb.de.genes.u133 <- merge(comb.de.genes, MIRu133, by.x = "miRNA", by.y = "a")
comb.de.genes.u133 <- comb.de.genes.u133[, c("miRNA", "deMIR", "Probe")]
for(column in letters[2:7]){
  temp <- merge(comb.de.genes, MIRu133, by.x = "miRNA", by.y = column)
  comb.de.genes.u133 <- rbind(comb.de.genes.u133, temp[, c("miRNA", "deMIR", "Probe")])
}
probes <- comb.de.genes.u133$Probe
names(probes) <- comb.de.genes.u133$miRNA
probes
```

```
##      MIR146A      MIR146A      MIR155      MIR21      MIR21
## "238225_at" "232504_at" "229437_at" "220990_s_at" "229417_at"
```

```
##      MIR23A      MIR23A      MIR34A      hsa-let-7b      hsa-let-7b
##      "235317_at" "1555847_a_at" "235571_at" "1557342_a_at" "241464_s_at"
##      MIR503
##      "227488_at"
```

Match selected probes to lists from drugs too see how many of the selected probes correspond to DE Mirs in specific drugs

```
vennResults2 <- lapply(vennResults, renameMir)
probeInDrug <- function(x){
  DrugProbes <- probes[names(probes) %in% x]
  numProbes <- length(DrugProbes)
  return(list("nProbes" = numProbes,
             "probes" = DrugProbes)
  )
}
drugProbes <- lapply(vennResults2, probeInDrug)
drugProbes
```

```
## $Vincristine
## $Vincristine$nProbes
## [1] 8
##
## $Vincristine$probes
##      MIR146A      MIR146A      MIR155      MIR21      MIR21
##      "238225_at" "232504_at" "229437_at" "220990_s_at" "229417_at"
##      MIR34A      hsa-let-7b      hsa-let-7b
##      "235571_at" "1557342_a_at" "241464_s_at"
##
##
## $Rituximab
## $Rituximab$nProbes
## [1] 2
##
## $Rituximab$probes
##      MIR155      MIR503
##      "229437_at" "227488_at"
##
##
## $Doxorubicin
## $Doxorubicin$nProbes
## [1] 4
##
## $Doxorubicin$probes
##      MIR155      MIR23A      MIR23A      MIR34A
##      "229437_at" "235317_at" "1555847_a_at" "235571_at"
##
##
## $Cyclophosphamide
## $Cyclophosphamide$nProbes
## [1] 2
##
## $Cyclophosphamide$probes
##      MIR146A      MIR146A
##      "238225_at" "232504_at"
```

Construct Venn-diagram with selected MIRS and probes

```
v1 <- venn.diagram(vennResults, filename = NULL, fill = 1:4)
v2 <- venn.diagram(lapply(drugProbes, function(x) x$probes), filename = NULL)

# Combine Labels
for(i in 9:23){
  if(v1[[i]]$label != "0"){
    v1[[i]]$label = paste(v1[[i]]$label, "(", v2[[i]]$label, ")")
  }
}

grid.newpage()
grid.draw(v1)
```

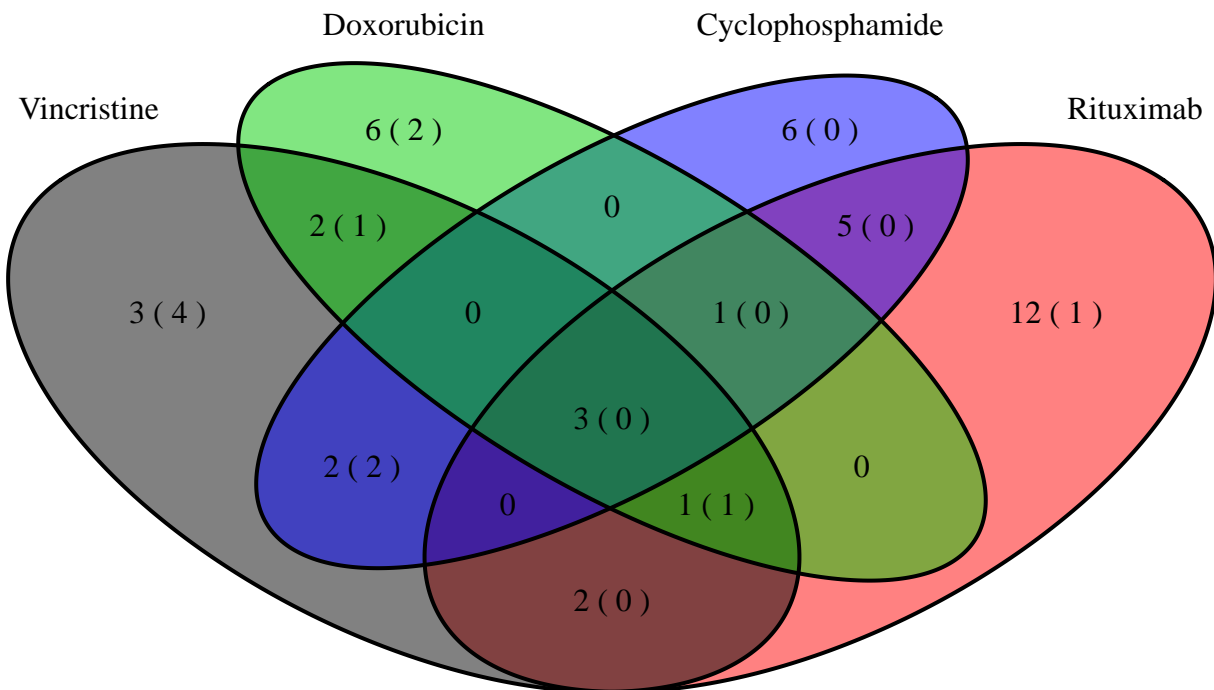

Check correlation of MIR and U133+2 array

load U133+2 data for cell-lines and adjust column names

```
bCellu133 <- just.rma(list.files("../ExternalData/Cell lines/CEL U133", full.names = T))
```

```
## Warning in just.rma(list.files("../ExternalData/Cell lines/CEL U133", full.names = T)): Incompatible
```

```
## Warning: replacing previous import 'AnnotationDbi::tail' by 'utils::tail'
```

```
## when loading 'hgu133plus2cdf'
```

```
## Warning: replacing previous import 'AnnotationDbi::head' by 'utils::head'
```

```

## when loading 'hgu133plus2cdf'
##
##
## Attaching package: 'hgu133plus2cdf'
## The following objects are masked from 'package:mirna102xgaincdf':
##
##      i2xy, xy2i
tempNames <- sapply(strsplit(colnames(bCellu133), "_"), function(x) x[3])
tempNames <- sub(".CEL", "", tempNames)
tempNames[15] <- substr(colnames(bCellu133)[15], 1, 8)
colnames(bCellu133) <- tempNames
bCellu133 <- bCellu133[, order(colnames(bCellu133))]
bCellu133 <- exprs(bCellu133)

Match columns in MIR and u133+2 datasets
table(colnames(bCellu133) == colnames(hsa.miRNA))

##
## TRUE
## 15

p <- list()
for(i in 1:nrow(comb.de.genes.u133)){
  mirName <- as.character(comb.de.genes.u133[i,2])
  u133Name <- as.character(comb.de.genes.u133[i,3])
  regression <- lm(bCellu133[u133Name,] ~ hsa.miRNA[mirName,])

  tempPlot <- data.frame("mir" = hsa.miRNA[mirName,],
                        "u133" = bCellu133[u133Name,])

  p[[i]] <- ggplot(tempPlot, aes(x=mir, y=u133)) +
    geom_point(shape=1) +
    geom_smooth(method=lm) +
    xlab(mirName) +
    ylab(u133Name) +
    ggtitle(comb.de.genes.u133[i,1]) +
    annotate("text", x = -Inf, y = -Inf, hjust = -1, vjust = -1,
           label = paste("R^2 = ", round(summary(regression)$r.squared, 2)))
}

grid.arrange(grobs = p, ncol = 3)

```



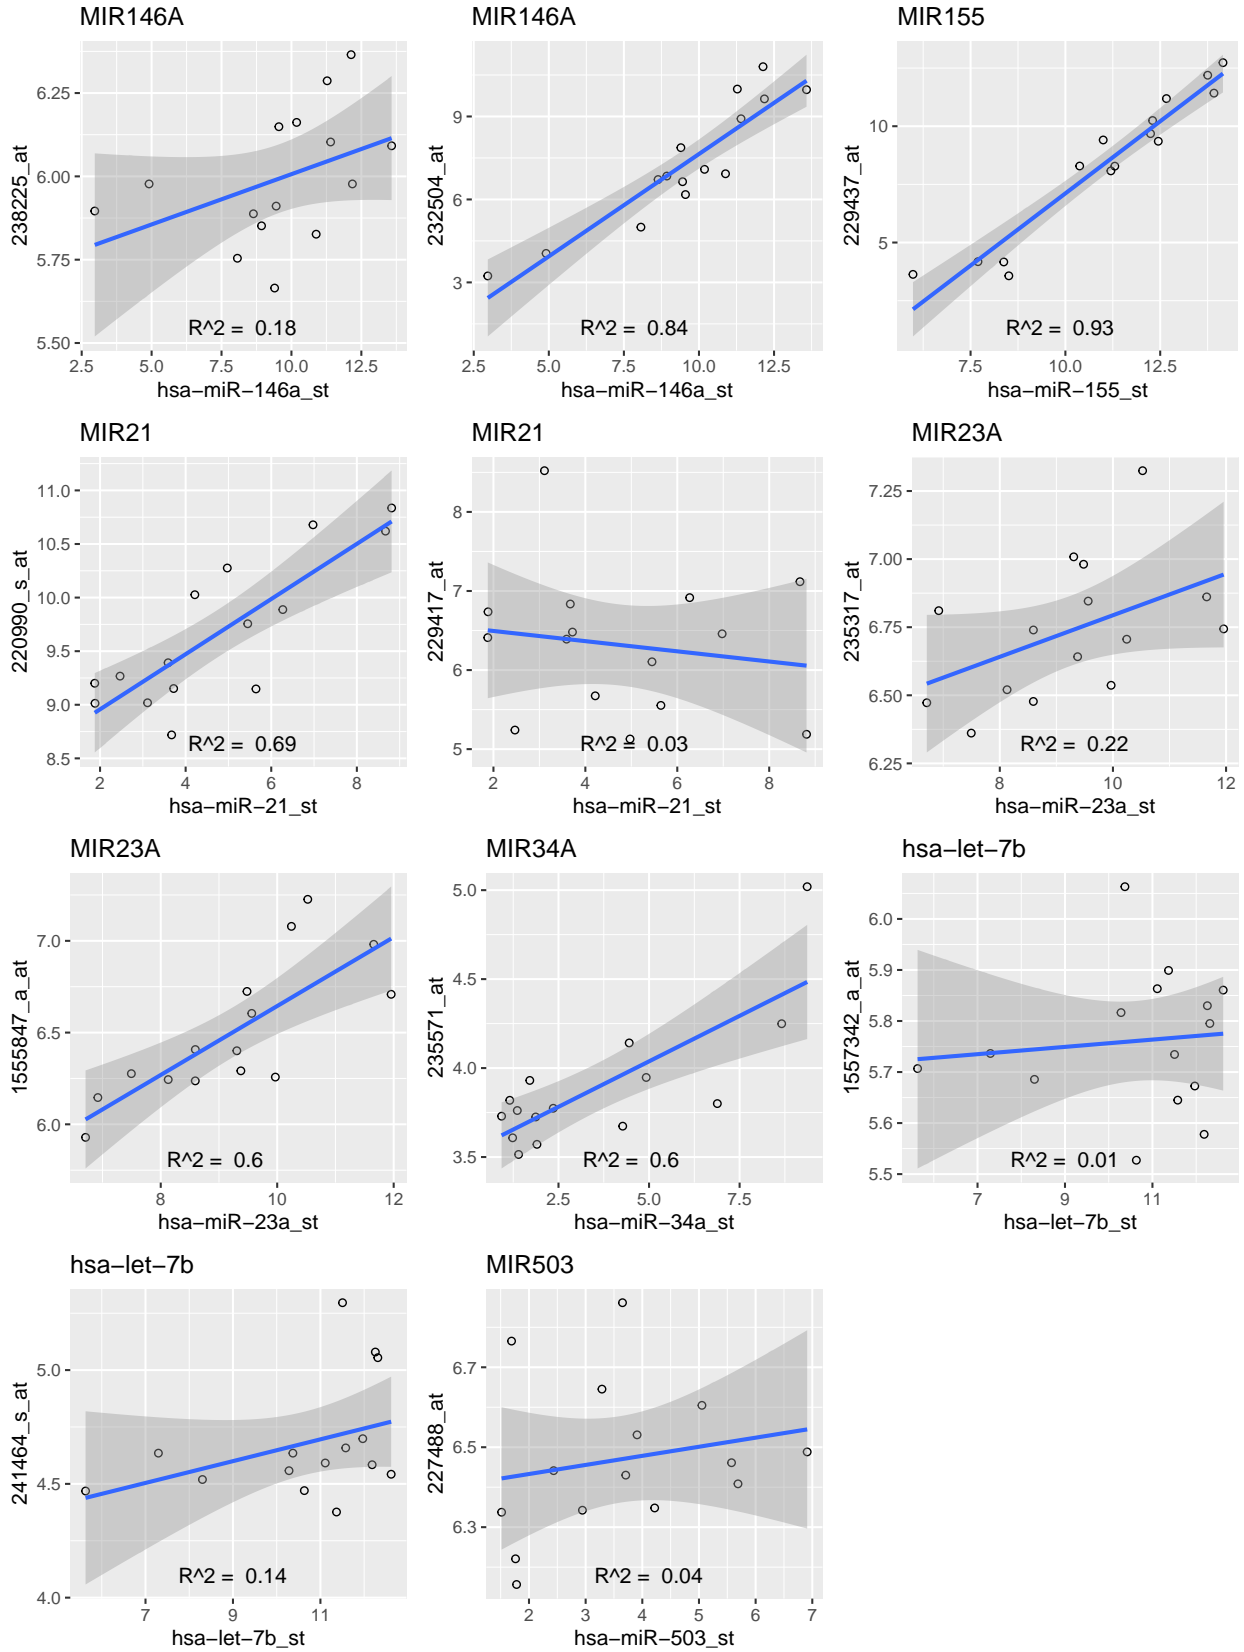

## Clinical Data

```
combined.data.combat.file <- "../GeneratedData/combined.data.combat.RData"
```

### Load and pre-process GEP Data

Load pre-normalized u133+2 datasets

```
load("../ExternalData/Clinical data/IDRC_cohort/CelFiles/pre-processed/GEPIDRC_RMA_affy.RData")
load("../ExternalData/Clinical data/LLMPP_cohort/CelFiles/pre-processed/GEPLLMPPRCHOP_RMA_affy.RData")
```

Read and normalize new data

```
AAUGEP.file <- "../GeneratedData/AAUGEP.file.Rdata"
if(!file.exists(AAUGEP.file)){
  AAU <- just.rma(list.files("../ExternalData/Clinical data/AAU_cohort/CelFiles/All/",
                             full.names = TRUE))
  GEPAAU <- exprs(AAU)
  save(GEPAAU, file = AAUGEP.file)
} else{
  load(AAUGEP.file)
}
```

Combine data and remove probes with missing data

```
if(!file.exists(combined.data.combat.file)){
  combined.data <- cbind(exprs(GEPIDRC), exprs(GEPLLMPPRCHOP), GEPAAU)
  combined.data <- combined.data[rowSums(is.na(combined.data))==0, ]
}
```

PCA plot to check for batch effects

```
combined.data.pca.file <- "../GeneratedData/combined.data.pca.Rdata"

if(!file.exists(combined.data.pca.file)){
  combineddata.pca <- prcomp(t(combined.data))
  save(combineddata.pca, file = combined.data.pca.file)
} else{
  load(combined.data.pca.file)
}
batch <- c(rep("IDRC", ncol(GEPIDRC)),
           rep("LLMPPRCHOP", ncol(GEPLLMPPRCHOP)),
           rep("AAU", ncol(GEPAAU)))

ggbiplot(combineddata.pca,
         obs.scale = 1,
         var.scale = 1,
         ellipse = T,
         var.axes = FALSE,
         choices = 1:2,
         groups = batch
        )
```

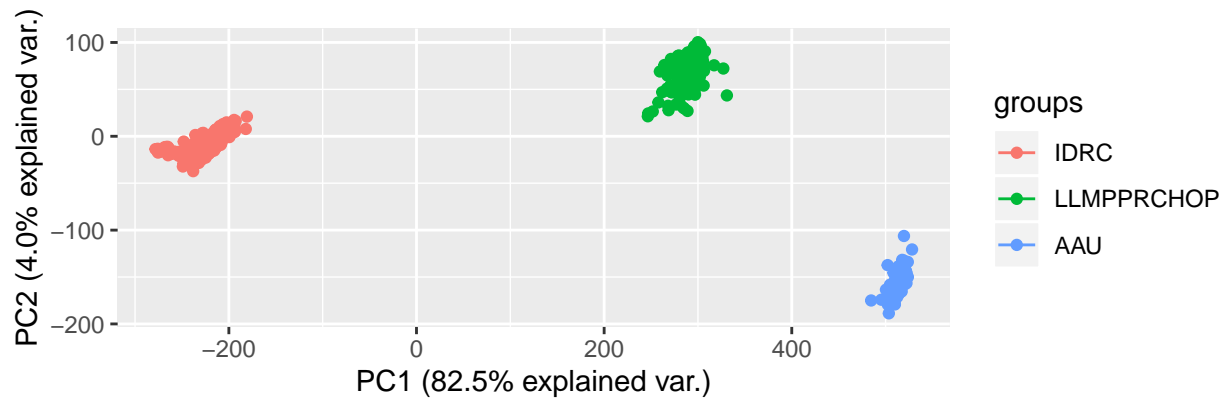

COMBAT adjust data

```
combined.data.combat.file <- "../GeneratedData/combined.data.combat.RData"
if(!file.exists(combined.data.combat.file)){
  combined.data.combat <- ComBat(combined.data,
                                batch = batch)
  save(combined.data.combat, file = combined.data.combat.file)
} else{
  load(combined.data.combat.file)
}

colnames(combined.data.combat) <- sub(".CEL", "", colnames(combined.data.combat))
colnames(combined.data.combat) <- sub(".cel", "", colnames(combined.data.combat))
colnames(combined.data.combat) <- sub("_\\(HG-U133_Plus_2\\)", "", colnames(combined.data.combat))
```

Check for batch effect after removal

```
combined.data.combat.pca.file <- "../GeneratedData/combined.data.combat.pca.RData"
if(!file.exists(combined.data.combat.pca.file)){
  combineddata.combat.pca <- prcomp(t(combined.data.combat))
  save(combineddata.combat.pca, file = combined.data.combat.pca.file)
} else{
  load(combined.data.combat.pca.file)
}

ggbiplot(combineddata.combat.pca,
         obs.scale = 1,
```

```

var.scale = 1,
ellipse = T,
var.axes = FALSE,
choices = 1:2,
groups = batch
)

```

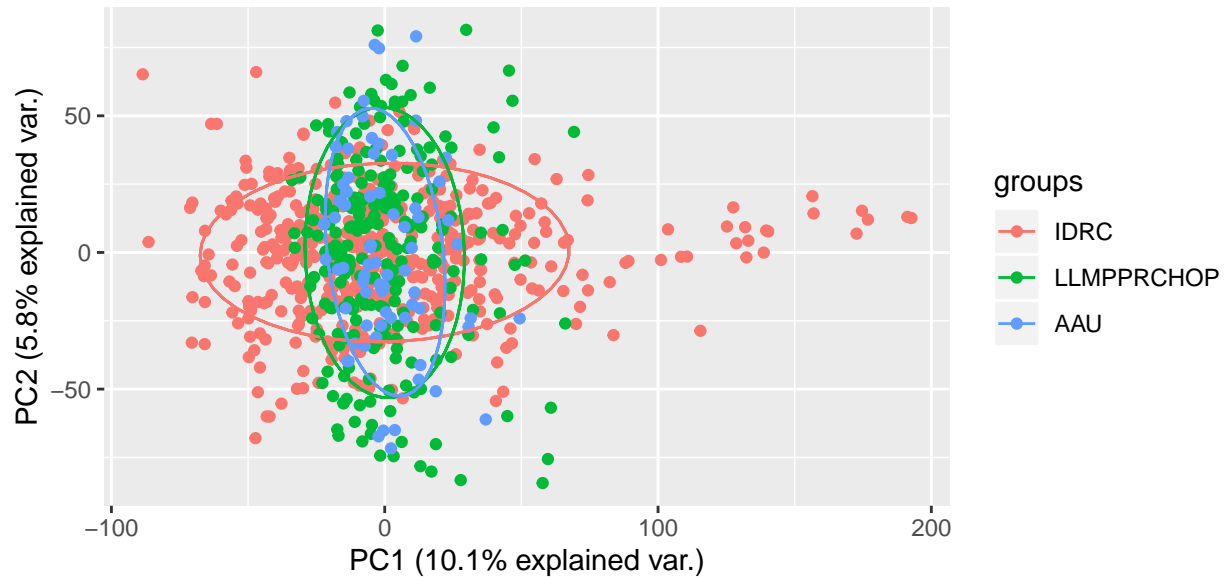

## Combine metadata

Load raw data

```

load("../ExternalData/Clinical data/IDRC_cohort/Metadata/metadataIDRC.RData")
load("../ExternalData/Clinical data/LLMPP_cohort/Metadata/metadataLLMPPRCHOP.RData")
load("../ExternalData/Clinical data/AAU_cohort/Metadata/metadata_AAUcohort_RMA_BC_affy.RData")
metadataAAU <- tmp1
rm(tmp1)

```

Extract columns from IDRC

```

IDRC.tmp <- subset(metadataIDRC, select = c("Array.Data.File",
                                           "IPI.score",
                                           "WrightClass2",
                                           "OS",
                                           "PFS",
                                           "age",
                                           "Response",

```

```

                                "Gender"))
IDRC.tmp$batch <- rep("IDRC", nrow(IDRC.tmp))
names(IDRC.tmp) <- c("ID", "IPI", "ABCGCB", "OS", "PFS", "age", "Response", "Gender", "study")

IDRC.tmp$IPI[IDRC.tmp$IPI == "UNK"] <- NA

```

Extract columns from LLMPPRCHOP

```

LLMPPRCHOP.tmp <- subset(metadataLLMPPRCHOP, select = c("GEO.ID",
                                                       "ipi",
                                                       "WrightClass2",
                                                       "OS",
                                                       "PFS",
                                                       "age",
                                                       "Response.to.Initial.Therapy",
                                                       "Gender"))
LLMPPRCHOP.tmp$batch <- rep("LLMPPRCHOP", nrow(LLMPPRCHOP.tmp))
names(LLMPPRCHOP.tmp) <- c("ID", "IPI", "ABCGCB", "OS", "PFS", "age", "Response", "Gender", "study")
LLMPPRCHOP.tmp$PFS[is.na(LLMPPRCHOP.tmp$PFS)] <- LLMPPRCHOP.tmp$OS[is.na(LLMPPRCHOP.tmp$PFS)]

## Recode response
LLMPPRCHOP.tmp$Response <- as.character(LLMPPRCHOP.tmp$Response)
LLMPPRCHOP.tmp$Response[LLMPPRCHOP.tmp$Response == ""] <- NA
LLMPPRCHOP.tmp$Response[LLMPPRCHOP.tmp$Response == "complete"] <- "CR"
LLMPPRCHOP.tmp$Response[LLMPPRCHOP.tmp$Response == "partial"] <- "PR"
LLMPPRCHOP.tmp$Response[LLMPPRCHOP.tmp$Response == "progression"] <- "PD"
LLMPPRCHOP.tmp$Response[LLMPPRCHOP.tmp$Response == "stable"] <- "SD"

```

Extract columns from AAU

```

metadataAAU$OS <- with(metadataAAU, Surv(FU, OS.censor))
metadataAAU$PFS <- with(metadataAAU, Surv(PFS, PFScensor))
AAU.tmp <- subset(metadataAAU, select = c("H.nummer",
                                         "IPI",
                                         "ABC.GCB",
                                         "OS",
                                         "PFS",
                                         "Alder"))

AAU.tmp$ABC.GCB <- as.character(AAU.tmp$ABC.GCB)
AAU.tmp$ABC.GCB[AAU.tmp$ABC.GCB == "NC"] <- "UC"
AAU.tmp$Response <- rep(NA, nrow(AAU.tmp))
AAU.tmp$Gender <- ifelse(metadataAAU$Gender == "Kvinde", "F", "M")
AAU.tmp$batch <- rep("AAU", nrow(AAU.tmp))
names(AAU.tmp) <- c("ID", "IPI", "ABCGCB", "OS", "PFS", "age", "Response", "Gender", "study")

```

Combine data

```

combined.metadata <- rbind(IDRC.tmp, LLMPPRCHOP.tmp, AAU.tmp)
combined.metadata <- droplevels.data.frame(combined.metadata)
combined.metadata$ID <- sub(".CEL", "", combined.metadata$ID)
combined.metadata$OS <- Surv(combined.metadata$OS[,1], combined.metadata$OS[,2])
combined.metadata$PFS <- Surv(combined.metadata$PFS[,1], combined.metadata$PFS[,2])

```

Unwrap OS and PFS variables. This is needed for calculation of the Brier score and time varying AUC.

```

combined.metadata$OStime <- combined.metadata$OS[,1]
combined.metadata$OSstatus <- combined.metadata$OS[,2]

combined.metadata$PFStime <- combined.metadata$PFS[,1]
combined.metadata$PFSstatus <- combined.metadata$PFS[,2]

# 5 year OS / PFS
time5 <- pmin(combined.metadata$OStime, 5)
status5 <- as.numeric(time5 < 5 & combined.metadata$OSstatus == 1)
combined.metadata$OS5 <- Surv(time = time5, event = status5)

time5 <- pmin(combined.metadata$PFStime, 5)
status5 <- as.numeric(time5 < 5 & combined.metadata$PFSstatus == 1)
combined.metadata$PFS5 <- Surv(time = time5, event = status5)

```

Plot survival in different studies included in the combined data

```

pfs.survfit <- survfit(PFS5~study, data = combined.metadata)
names(pfs.survfit$strata) <- sub("study=", "", names(pfs.survfit$strata))
pfs.study.plot <- ggsurvplot(pfs.survfit,
  data = combined.metadata,
  title = "PFS5 by study",
  pval = TRUE)

os.survfit <- survfit(OS5~study, data = combined.metadata)
names(os.survfit$strata) <- sub("study=", "", names(os.survfit$strata))
os.study.plot <- ggsurvplot(os.survfit,
  data = combined.metadata,
  title = "OS5 by study",
  pval = TRUE)

arrange_ggsurvplots(list(pfs.study.plot, os.study.plot))

```

## PFS5 by study

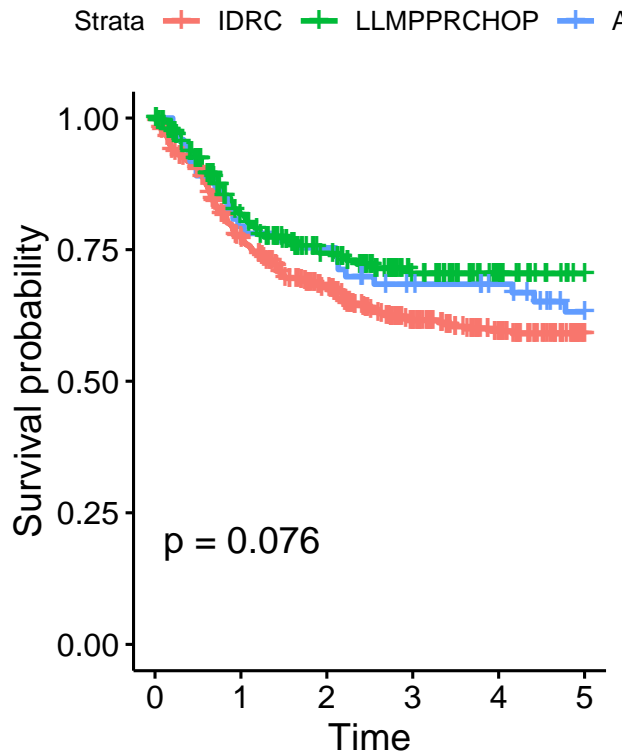

## OS5 by study

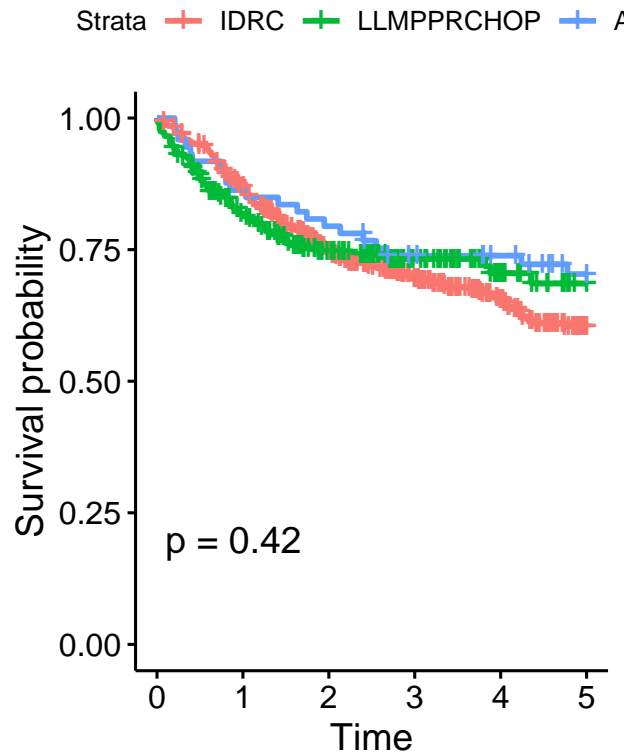

Get 5-year OS / PFS times

```
pfs.sum <- summary(pfs.survfit, times = 5)
os.sum <- summary(os.survfit, times = 5)
pfs.sum
```

```
## Call: survfit(formula = PFS5 ~ study, data = combined.metadata)
##
##           IDRC
##      time  n.risk  n.event  survival  std.err
##      5.000   81.000  172.000    0.590    0.025
## lower 95% CI upper 95% CI
##      0.543     0.641
##
##           LLMPPRCHOP
##      time  n.risk  n.event  survival  std.err
##      5.0000   22.0000   56.0000    0.7045    0.0343
## lower 95% CI upper 95% CI
##      0.6403     0.7751
##
##           AAU
##      time  n.risk  n.event  survival  std.err
##      5.0000   33.0000   26.0000    0.6318    0.0582
## lower 95% CI upper 95% CI
##      0.5275     0.7568
```

```
os.sum
```

```
## Call: survfit(formula = OS5 ~ study, data = combined.metadata)
##
##              IDRC
##      time      n.risk      n.event      survival      std.err
##      5.0000      98.0000     155.0000       0.6044       0.0266
## lower 95% CI upper 95% CI
##      0.5544       0.6589
##
##              LLMPRCHOP
##      time      n.risk      n.event      survival      std.err
##      5.0000      24.0000      60.0000       0.6854       0.0393
## lower 95% CI upper 95% CI
##      0.6125       0.7670
##
##              AAU
##      time      n.risk      n.event      survival      std.err
##      5.0000      38.0000      21.0000       0.7036       0.0548
## lower 95% CI upper 95% CI
##      0.6040       0.8195
```

Create metadata summary table

```
# Survival summary
table1.pfs <- paste0(round(pfs.sum$surv, 2), " (", round(pfs.sum$lower, 2), ";", round(pfs.sum$upper, 2), ")")
table1.os <- paste0(round(os.sum$surv, 2), " (", round(os.sum$lower, 2), ";", round(os.sum$upper, 2), ")")

metaSummary <- rbind(table(combined.metadata$study),
  t(table(combined.metadata$study, combined.metadata$Gender)),
  tapply(combined.metadata$age, combined.metadata$study, median),
  tapply(combined.metadata$age, combined.metadata$study,
    function(x) paste(range(x), collapse = "-")),
  t(table(combined.metadata$study, as.numeric(as.character(combined.metadata$IPI)) < 2)),
  t(tapply(combined.metadata$IPI, combined.metadata$study, function(x) sum(is.na(x)))),
  t(table(combined.metadata$study, combined.metadata$ABCGCB)),
  t(table1.pfs),
  t(table1.os))
row.names(metaSummary) <- c("N", "Female", "Male", "Median age",
  "Range age", "IPI 0-1", "IPI 2-5",
  "IPI NA", "ABC", "GCB", "UC", "5-year PFS", "5-year OS")
kable(metaSummary)
```

|            | IDRC  | LLMPRCHOP | AAU   |
|------------|-------|-----------|-------|
| N          | 468   | 233       | 73    |
| Female     | 198   | 99        | 30    |
| Male       | 270   | 134       | 43    |
| Median age | 63    | 61        | 66    |
| Range age  | 18-92 | 17-92     | 20-87 |
| IPI 0-1    | 254   | 94        | 48    |
| IPI 2-5    | 168   | 70        | 21    |
| IPI NA     | 46    | 69        | 4     |
| ABC        | 199   | 93        | 32    |
| GCB        | 225   | 107       | 32    |



|            | IDRC             | LLMPPRCHOP       | AAU              |
|------------|------------------|------------------|------------------|
| UC         | 44               | 33               | 9                |
| 5-year PFS | 0.59 (0.54;0.64) | 0.7 (0.64;0.78)  | 0.63 (0.53;0.76) |
| 5-year OS  | 0.6 (0.55;0.66)  | 0.69 (0.61;0.77) | 0.7 (0.6;0.82)   |

Check if metadata match GEP data

```
table(colnames(combined.data.combat) %in% combined.metadata$ID)
```

```
##
## FALSE TRUE
##      2   774
```

Two GEP files have no data, so they are removed

```
combined.data.combat <- combined.data.combat[, colnames(combined.data.combat) %in%
                                                combined.metadata$ID]
```

Function to do uni- and multivariate cox regressions and summarize results

```
uni.multi.cox <- function(cox.data, probes, outcome = "OS"){
  ## Univariate Cox for each probe
  uni.cox.results <- list()
  for(i in 1:length(probes)){
    uni.cox.formula <- formula(paste0(outcome,"~","study+", "`",probes[i],"`"))
    uni.cox.results[[probes[i]]] <- summary(coxph(uni.cox.formula, data = cox.data))
  }

  ## Summarize univariate results
  uni.coef <- round(sapply(uni.cox.results, function(x) x$coefficients[3,2]),2 )
  uni.conf <- round(t(sapply(uni.cox.results, function(x) x$conf.int[3,3:4])),2)
  uni.conf <- paste0("(", uni.conf[,1], ";", uni.conf[,2],)")")
  uni.p <- round(sapply(uni.cox.results, function(x) x$coefficients[3,5]),3)

  ## Multivariate Cox
  multi.cox.formula <- formula(paste0(outcome,"~","study+", "`",
                                     paste(probes, collapse="`+`"), "`"))
  multi.cox <- summary(coxph(multi.cox.formula, data = cox.data))

  ## Summarize multivariate results
  multi.coef <- round(multi.cox$coefficients[-c(1,2),2], 2)
  multi.conf <- round(multi.cox$conf.int[-c(1,2),3:4], 2)
  multi.conf <- paste0("(", multi.conf[,1], ";", multi.conf[,2],)")")
  multi.p <- round(multi.cox$coefficients[-c(1,2),5], 3)

  combined.results <- data.frame("MIR" = names(probes),
                                "uni.HR" = uni.coef,
                                "uni.conf" = uni.conf,
                                "uni.p" = uni.p,
                                "multi.HR" = multi.conf,
                                "multi.conf" = multi.conf,
                                "multi.p" = multi.p)

  return(list("uni.cox.results" = uni.cox.results,
             "multi.cox.results" = multi.cox,
```

```

    "combined.results" = combined.results))
}

```

## Analysis with Cross-validation

```

timeVaryingAUC <- function(survivalPrediction, timeVar, delta, evalTimes){
  timeAUC <- rep(NA, length(evalTimes))
  for(i in 1:length(evalTimes)){
    timeAUC[i] <- timeROC(T = timeVar,
                          marker = - survivalPrediction[, i],
                          delta = delta,
                          times = evalTimes[i],
                          cause = 1)$AUC[2]
  }
  timeAUC
}

```

Function to plot a list of timeVarying AUCs

```

plottAUC <- function(x, times.interest = times.interest){
  nvar <- length(x)
  xx <- data.frame("time" = rep(times.interest, nvar),
                  "tAUC" = unlist(x),
                  "Model" = rep(names(x), each = length(times.interest)))
  ggplot(xx, aes(x = time, y = tAUC, col = Model)) +
    geom_line() +
    ylab("tAUC") +
    ylim(c(0.4,0.75))
}

plottAUCList <- function(x, times.interest = times.interest){
  nvar <- length(x[[1]])
  xx <- list()
  for(i in 1:length(x)){
    xx[[i]] <- data.frame("time" = rep(times.interest, nvar),
                        "tAUC" = unlist(x[[i]]),
                        "Model" = rep(names(x[[i]]), each = length(times.interest)))
  }
  p <- ggplot(xx[[i]], aes(x = time, y = tAUC, col = Model)) +
    geom_line() +
    ylab("tAUC") +
    ylim(c(0.4,0.8))

  for(i in 2:length(xx)){
    p <- p + geom_line(data = xx[[i]])
  }
  return(p)
}

plottAUCListMean <- function(x, times.interest = times.interest){
  models <- names(x[[1]])
  plotData <- data.frame("Model" = NULL, "time" = NULL, "Mean" = NULL, "SD" = NULL)

```

```

for(m in models){
  y <- sapply(x, function(x) x[[m]])
  means <- rowMeans(y)
  sds <- rowSds(y)
  temp <- data.frame("Model" = rep(m, length(means)),
                    "time" = times.interest,
                    "Mean" = means,
                    "SD" = sds)
  plotData = rbind(plotData, temp)
}

ggplot(plotData, aes(x = time, y = Mean, col = Model)) +
  geom_line(size = 1.5) +
  ylab("tAUC") +
  ylim(c(0.4,0.8)) +
  geom_ribbon(aes(x = time, ymin = (Mean -2*SD),
                ymax = (Mean+2*SD), fill = Model), alpha = 0.2)
}

```

Function to do plots for Brier Score

```

plotPec <- function(pecx){
  nvar <- length(pecx$AppErr)
  xx <- data.frame("time" = rep(pecx$time, nvar),
                  "AppErr" = unlist(pecx$AppErr),
                  "Model" = rep(names(pecx$AppErr), each = length(pecx$time)))
  ggplot(xx, aes(x = time, y = AppErr, col = Model)) +
    geom_line() +
    ylab("Prediction Error") +
    ylim(c(0,0.3))
}

plotPecList <- function(pecx){
  nvar <- length(pecx[[1]][["AppErr"]])
  xx <- list()
  for(i in 1:length(pecx)){
    xx[[i]] <- data.frame("time" = rep(pecx[[i]][["time"]], nvar),
                        "AppErr" = unlist(pecx[[i]][["AppErr"]]),
                        "Model" = rep(names(pecx[[i]][["AppErr"]]),
                                      each = length(pecx[[i]][["time"]]))))
  }
  p <- ggplot(xx[[1]], aes(x = time, y = AppErr, col = Model)) +
    geom_line() +
    ylab("Prediction Error") +
    ylim(c(0,0.3))

  for(i in 2:length(xx)){
    p <- p + geom_line(data = xx[[i]])
  }
  return(p)
}

plotPecListMean <- function(pecx){
  models <- names(pecx[[1]][["AppErr"]])

```

```

plotData <- data.frame("Model" = NULL, "time" = NULL, "Mean" = NULL, "SD" = NULL)

for(m in models){
  y <- sapply(pecx, function(x) x[["AppErr"]][[m]])
  means <- rowMeans(y)
  sds <- rowSds(y)
  temp <- data.frame("Model" = rep(m, length(means)),
                    "time" = pecx[[1]][["time"]],
                    "Mean" = means,
                    "SD" = sds)
  plotData = rbind(plotData, temp)
}
ggplot(plotData, aes(x = time, y = Mean, col = Model)) +
  geom_line() +
  ylab("Prediction Error") +
  ylim(c(0.1,0.3)) + xlim(c(1,5)) +
  geom_ribbon(aes(x = time, ymin = (Mean -2*SD),
                 ymax = (Mean+2*SD), fill = Model), alpha = 0.2)
}

```

Specify times of interest

```
evalTimes <- seq(0,5, by = 0.5)
```

In this section we perform a more formal 10 fold cross validation of the different models. we randomly split the data into ten groups, and then iteratively train on 9/10 of the data and predict on the remaining 1/10. We can then evaluate the performance of the model in the entire dataset.

Set parameters for cross validation

```

nFolds <- 10
nRepsCV <- 10
recompute.cv <- FALSE

```

Split data into training and validation. Train models and predict.

```

results.cv.file <- file.path("../GeneratedData/results.cvRep.file.Rdata")

if(file.exists(results.cv.file) & recompute.cv == FALSE){
  load(results.cv.file)
} else{
  results.cv.reps <- list()
  times.interest <- seq(0,5, by = 0.5)
  batchSize <- table(combined.metadata$study)
  set.seed(191919)

  for(rep in 1:nRepsCV){
    results.cv <- list()
    results.cv.scores <- list()

    combined.metadata$cv <- c(sample(1:nFolds, batchSize[1], replace = TRUE),
                             sample(1:nFolds, batchSize[2], replace = TRUE),
                             sample(1:nFolds, batchSize[3], replace = TRUE))

    ## Loop over different subsets of data

```

```

for(subData in c("ALL", "ABC", "GCB")){

  ## Select subset of metadata
  if(subData != "ALL"){
    combined.metadata2 <- subset(combined.metadata, ABCGCB == subData)
  } else{
    combined.metadata2 <- combined.metadata
  }

  ## Dicotomize IPI
  combined.metadata2$IPI <- factor(ifelse(combined.metadata2$IPI %in% c("0", "1"), "0-1", "2-5"))

  ## Prepare matrices for output
  predictCoxIPI <- matrix(NA, ncol = length(times.interest), nrow = nrow(combined.metadata2),
                          dimnames = list(combined.metadata2$ID))
  predictCoxAge <- matrix(NA, ncol = length(times.interest), nrow = nrow(combined.metadata2),
                          dimnames = list(combined.metadata2$ID))
  predictCoxMIR <- matrix(NA, ncol = length(times.interest), nrow = nrow(combined.metadata2),
                          dimnames = list(combined.metadata2$ID))
  predictRSF <- matrix(NA, ncol = length(times.interest), nrow = nrow(combined.metadata2),
                       dimnames = list(combined.metadata2$ID))
  predictCoxMIRIPI <- matrix(NA, ncol = length(times.interest), nrow = nrow(combined.metadata2),
                             dimnames = list(combined.metadata2$ID))
  predictRSFMIRIPI <- matrix(NA, ncol = length(times.interest), nrow = nrow(combined.metadata2),
                              dimnames = list(combined.metadata2$ID))

  ## Matrices for linear predictions
  scoreCoxMIR <- matrix(NA, ncol = 1, nrow = nrow(combined.metadata2),
                        dimnames = list(combined.metadata2$ID))
  scoreCoxMIRIPI <- matrix(NA, ncol = 1, nrow = nrow(combined.metadata2),
                            dimnames = list(combined.metadata2$ID))

  ## Loop over folds
  for(i in 1:nFolds){

    ## Select meta and gep data for training and validation
    meta.train <- subset(combined.metadata2, cv != i)
    meta.val <- subset(combined.metadata2, cv == i)
    gep.train.sc <- microarrayScale(combined.data.combat[probes, meta.train$ID], scale = FALSE)
    gep.val.sc <- microarrayScale(combined.data.combat[probes, meta.val$ID])

    ## Fit cox models with age or IPI
    fit.cox.age <- coxph(PFS ~ age, data = meta.train)
    fit.cox.IPI <- coxph(PFS ~ IPI, data = meta.train)

    ## Fit Random survival forest w/ wo IPI
    trainInput <- data.frame("time"=meta.train$PFS[,1],
                             "status"=meta.train$PFS[,2], t(gep.train.sc))
    fit.rsfc <- rfsrc(formula = Surv(time, status)~.,
                      data = trainInput,
                      ntree = 1000)

    trainInput$IPI <- meta.train$IPI
  }
}

```

```

fit.rsfc.IPI <- rfsrc(formula = Surv(time, status)~.,
                    data = trainInput,
                    ntree = 1000)

## Fit cox models with MIR by first doing univariate cox for each probe
## adjusted for effect of study, and then selecting the significant probes
cox.data <- data.frame(meta.train, t(gep.train.sc))
names(cox.data) <- c(names(meta.train), probes)

cox.temp <- uni.multi.cox(cox.data, probes, outcome = "PFS")
sig.probes <- row.names(cox.temp$combined.results[cox.temp$combined.results$uni.p<0.05,])

trainInput.sig.probes <- data.frame(meta.train$PFS, t(gep.train.sc[sig.probes,,drop=FALSE]))
names(trainInput.sig.probes) <- c("PFS", sig.probes)
fit.cox.MIR <- coxph(PFS~., data = trainInput.sig.probes)

## Add IPI to MIR prediction
trainInput.sig.probes$IPI <- meta.train$IPI
fit.cox.MIRIPI <- coxph(PFS~., data = trainInput.sig.probes)

## Get standard deviation of probes in training data and build validation data
trainSDs <- rowSds(combined.data.combat[probes, meta.train$ID])
valInput <- data.frame(meta.val$age, meta.val$IPI, t(gep.val.sc*trainSDs))
names(valInput) <- c("age", "IPI", probes)
valInput.rsfc <- data.frame(valInput[,probes])
valInput.rsfc.ipi <- data.frame(valInput[,,-1])

## Predict in validation data and save results
predictCoxAge[meta.val$ID,] <- predictSurvProb(fit.cox.age,
                                              newdata = valInput,
                                              times = times.interest)
predictCoxIPI[meta.val$ID,] <- predictSurvProb(fit.cox.IPI,
                                              newdata = valInput,
                                              times = times.interest)
if(!is.null(coef(fit.cox.MIR))){
  predictCoxMIR[meta.val$ID,] <- predictSurvProb(fit.cox.MIR,
                                              newdata = valInput,
                                              times = times.interest)
}
predictRSF[meta.val$ID,] <- predictSurvProb(fit.rsfc,
                                           newdata = valInput.rsfc,
                                           times = times.interest)
predictCoxMIRIPI[meta.val$ID,] <- predictSurvProb(fit.cox.MIRIPI,
                                                  newdata = valInput,
                                                  times = times.interest)
predictRSFMIRIPI[meta.val$ID,] <- predictSurvProb(fit.rsfc.IPI,
                                                  newdata = valInput.rsfc.ipi,
                                                  times = times.interest)

## Linear predictions for coxMIR models
if(!is.null(coef(fit.cox.MIR))){
  scoreCoxMIR[meta.val$ID,1] <- predict(fit.cox.MIR, newdata = valInput)
}

```

```

scoreCoxMIRIPI[meta.val$ID,1] <- predict(fit.cox.MIRIPI, newdata = valInput)

}
results.cv[[subData]] <- list("CoxAge" = predictCoxAge,
                             "CoxIPI" = predictCoxIPI,
                             "CoxMIR" = predictCoxMIR,
                             "RSFMIR" = predictRSF,
                             "CoxMIRIPI" = predictCoxMIRIPI,
                             "RSFMIRIPI" = predictRSFMIRIPI)
results.cv.scores[[subData]] <- list("scoreCoxMIR" = scoreCoxMIR,
                                     "scoreCoxMIRIPI" = scoreCoxMIRIPI)
}
results.cv.reps[[rep]] <- list("cv" = results.cv, "scores" = results.cv.scores)
}
save(results.cv.reps, times.interest, file = results.cv.file, nRepsCV)
}

```

## Results of CV on OS

We first evaluate the predictive accuracy of the model on overall survival.

Calculate brier score for OS

```

error.all.OS <- list()
error.abc.OS <- list()
error.gcb.OS <- list()

for(i in 1:nRepsCV){
error.all.OS[[i]] <- pec(results.cv.reps[[i]][["cv"]][["ALL"]],
                        formula = Surv(OStime,OSstatus) ~ 1,
                        data = combined.metadata,
                        times = times.interest,
                        reference = F,
                        verbose = T, exact = FALSE)

error.abc.OS[[i]] <- pec(results.cv.reps[[i]][["cv"]][["ABC"]],
                        formula = Surv(OStime,OSstatus) ~ 1,
                        data = subset(combined.metadata, ABCGCB == "ABC"),
                        times = times.interest,
                        reference = F,
                        verbose = T, exact = FALSE)

error.gcb.OS[[i]] <- pec(results.cv.reps[[i]][["cv"]][["GCB"]],
                        formula = Surv(OStime,OSstatus) ~ 1,
                        data = subset(combined.metadata, ABCGCB == "GCB"),
                        times = times.interest,
                        reference = F,
                        verbose = T, exact = FALSE)
}

```

```
}
```

```
## No covariates specified: Kaplan-Meier for censoring times used for weighting.
## No covariates specified: Kaplan-Meier for censoring times used for weighting.
## No covariates specified: Kaplan-Meier for censoring times used for weighting.
## No covariates specified: Kaplan-Meier for censoring times used for weighting.
## No covariates specified: Kaplan-Meier for censoring times used for weighting.
## No covariates specified: Kaplan-Meier for censoring times used for weighting.
## No covariates specified: Kaplan-Meier for censoring times used for weighting.
## No covariates specified: Kaplan-Meier for censoring times used for weighting.
## No covariates specified: Kaplan-Meier for censoring times used for weighting.
## No covariates specified: Kaplan-Meier for censoring times used for weighting.
## No covariates specified: Kaplan-Meier for censoring times used for weighting.
## No covariates specified: Kaplan-Meier for censoring times used for weighting.
## No covariates specified: Kaplan-Meier for censoring times used for weighting.
## No covariates specified: Kaplan-Meier for censoring times used for weighting.
## No covariates specified: Kaplan-Meier for censoring times used for weighting.
## No covariates specified: Kaplan-Meier for censoring times used for weighting.
## No covariates specified: Kaplan-Meier for censoring times used for weighting.
## No covariates specified: Kaplan-Meier for censoring times used for weighting.
## No covariates specified: Kaplan-Meier for censoring times used for weighting.
## No covariates specified: Kaplan-Meier for censoring times used for weighting.
## No covariates specified: Kaplan-Meier for censoring times used for weighting.
## No covariates specified: Kaplan-Meier for censoring times used for weighting.
## No covariates specified: Kaplan-Meier for censoring times used for weighting.
## No covariates specified: Kaplan-Meier for censoring times used for weighting.
## No covariates specified: Kaplan-Meier for censoring times used for weighting.
## No covariates specified: Kaplan-Meier for censoring times used for weighting.
## No covariates specified: Kaplan-Meier for censoring times used for weighting.
## No covariates specified: Kaplan-Meier for censoring times used for weighting.
## No covariates specified: Kaplan-Meier for censoring times used for weighting.
## No covariates specified: Kaplan-Meier for censoring times used for weighting.
## No covariates specified: Kaplan-Meier for censoring times used for weighting.
## No covariates specified: Kaplan-Meier for censoring times used for weighting.
## No covariates specified: Kaplan-Meier for censoring times used for weighting.
```

Calucate time varying AUCs

```
tAUC.all.OS <- list()
tAUC.abc.OS <- list()
tAUC.gcb.OS <- list()

tAUC.OS.ALL <- function(x) timeVaryingAUC(x, combined.metadata$OStime,
                                           combined.metadata$OSstatus, times.interest)
tAUC.OS.ABC <- function(x) timeVaryingAUC(x, subset(combined.metadata, ABCGCB == "ABC")$OStime,
                                           subset(combined.metadata, ABCGCB == "ABC")$OSstatus,
                                           times.interest)
tAUC.OS.GCB <- function(x) timeVaryingAUC(x, subset(combined.metadata, ABCGCB == "GCB")$OStime,
                                           subset(combined.metadata, ABCGCB == "GCB")$OSstatus,
                                           times.interest)

for(rep in 1:nRepsCV){
  tAUC.all.OS[[rep]] <- lapply(results.cv.reps[[rep]][["cv"]][["ALL"]], tAUC.OS.ALL)
  tAUC.abc.OS[[rep]] <- lapply(results.cv.reps[[rep]][["cv"]][["ABC"]], tAUC.OS.ABC)
  tAUC.gcb.OS[[rep]] <- lapply(results.cv.reps[[rep]][["cv"]][["GCB"]], tAUC.OS.GCB)
}
```

Plot Results



```

# Brier Scores
p11 <- plotPecListMean(error.all.OS) + ggtitle("ALL: OS") +
  scale_color_discrete(guide = FALSE) +
  xlab("") + scale_fill_discrete(guide = FALSE) +
  labs(tag = "A")
p12 <- plotPecListMean(error.abc.OS) + ggtitle("ABC: OS") +
  scale_color_discrete(guide = FALSE) +
  xlab("") + scale_fill_discrete(guide = FALSE) +
  ylab("") + labs(tag = "B")
p13 <- plotPecListMean(error.gcb.OS) + ggtitle("GCB: OS") +
  xlab("") + ylab("") + labs(tag = "C")

# tAUC
p21 <- plottAUCListMean(tAUC.all.OS, times.interest) +
  scale_color_discrete(guide = FALSE) +
  scale_fill_discrete(guide = FALSE) + labs(tag = "D")
p22 <- plottAUCListMean(tAUC.abc.OS, times.interest) +
  scale_color_discrete(guide = FALSE) +
  ylab("") + scale_fill_discrete(guide = FALSE) + labs(tag = "E")
p23 <- plottAUCListMean(tAUC.gcb.OS, times.interest) +
  ylab("") + labs(tag = "F")

grid.arrange(p11,p12,p13,p21,p22,p23, ncol = 3, widths = c(2,2,3.2))

```

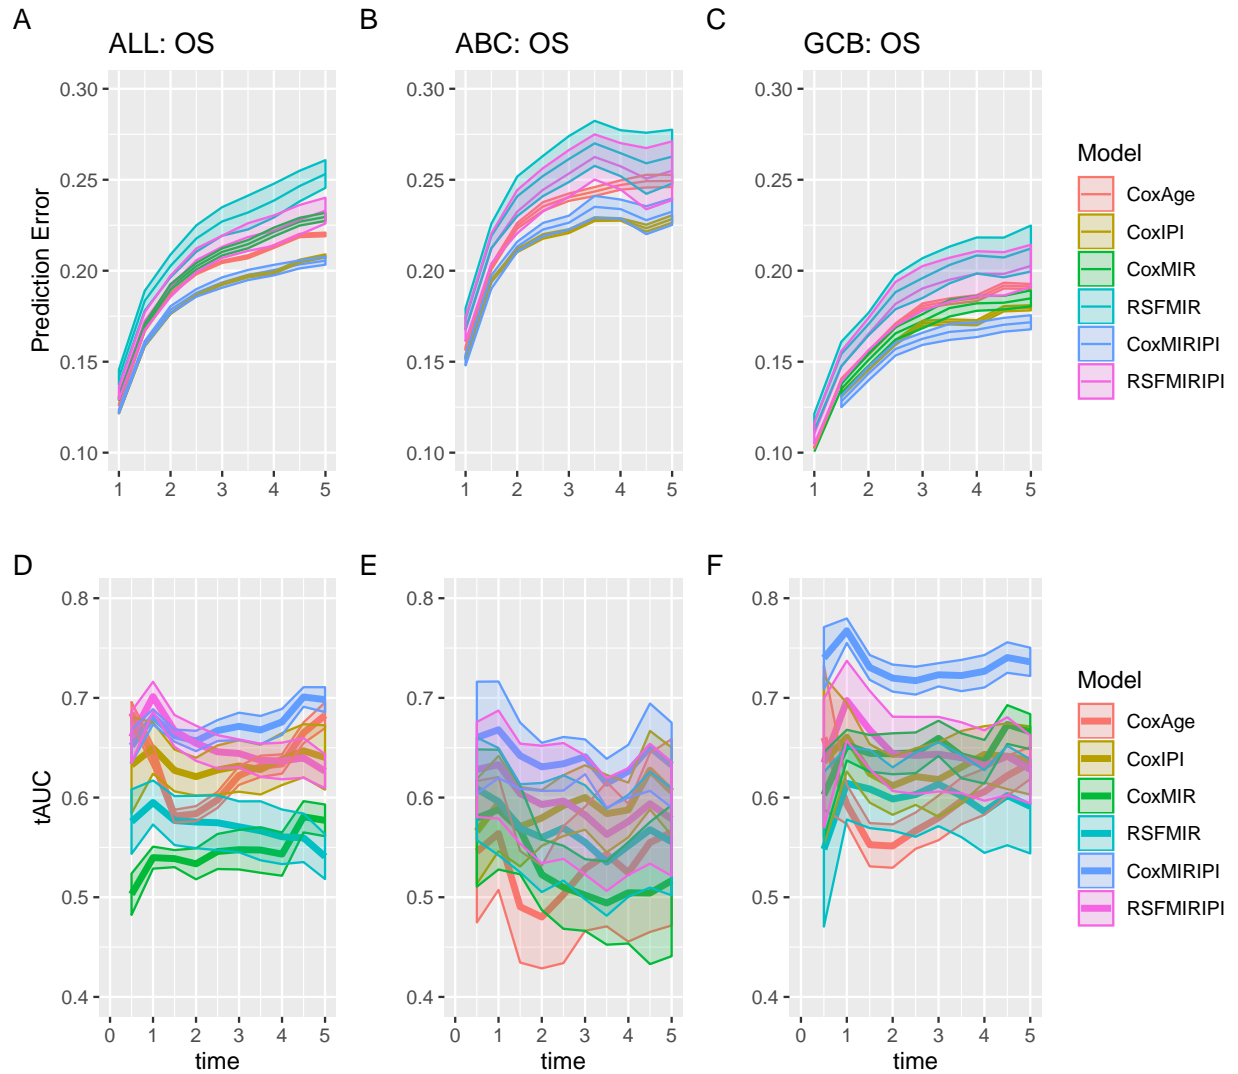

## Results of CV on PFS

Next the predictive accuracy for progression free survival is evaluated.

Calculate brier score for PFS

```

error.all.PFS <- list()
error.abc.PFS <- list()
error.gcb.PFS <- list()

for(i in 1:nRepsCV){
error.all.PFS[[i]] <- pec(results.cv.reps[[i]][["cv"]][["ALL"]],
  formula = Surv(PFStime, PFSstatus) ~ 1,
  data = combined.metadata,
  times = times.interest,
  reference = F,
  verbose = T, exact = FALSE)
}

```



```

                                combined.metadata$PFSstatus,
                                times.interest)
tAUC.PFS.ABC <- function(x) timeVaryingAUC(x, subset(combined.metadata, ABCGCB == "ABC")$PFStime,
                                subset(combined.metadata, ABCGCB == "ABC")$PFSstatus,
                                times.interest)
tAUC.PFS.GCB <- function(x) timeVaryingAUC(x, subset(combined.metadata, ABCGCB == "GCB")$PFStime,
                                subset(combined.metadata, ABCGCB == "GCB")$PFSstatus,
                                times.interest)

for(rep in 1:nRepsCV){
  tAUC.all.PFS[[rep]] <- lapply(results.cv.reps[[rep]][["cv"]][["ALL"]], tAUC.PFS.ALL)
  tAUC.abc.PFS[[rep]] <- lapply(results.cv.reps[[rep]][["cv"]][["ABC"]], tAUC.PFS.ABC)
  tAUC.gcb.PFS[[rep]] <- lapply(results.cv.reps[[rep]][["cv"]][["GCB"]], tAUC.PFS.GCB)
}

```

Plot Results

```

# Brier Scores
p11 <- plotPecListMean(error.all.PFS) + ggtitle("ALL: PFS") +
  scale_color_discrete(guide = FALSE) +
  scale_fill_discrete(guide = FALSE) +
  xlab("") + labs(tag = "A")
p12 <- plotPecListMean(error.abc.PFS) + ggtitle("ABC: PFS") +
  scale_color_discrete(guide = FALSE) +
  scale_fill_discrete(guide = FALSE) +
  xlab("") + ylab("") + labs(tag = "B")
p13 <- plotPecListMean(error.gcb.PFS) + ggtitle("GCB: PFS") +
  xlab("") + ylab("") + labs(tag = "C")

#tAUC
p21 <- plottAUCListMean(tAUC.all.PFS, times.interest) +
  scale_color_discrete(guide = FALSE) +
  scale_fill_discrete(guide = FALSE) + labs(tag = "D")
p22 <- plottAUCListMean(tAUC.abc.PFS, times.interest) +
  scale_color_discrete(guide = FALSE) +
  scale_fill_discrete(guide = FALSE) + ylab("") + labs(tag = "E")
p23 <- plottAUCListMean(tAUC.gcb.PFS, times.interest) +
  ylab("") + labs(tag = "F")

fig2 <- grid.arrange(p11,p12,p13,p21,p22,p23, ncol = 3, widths = c(2,2,3.2))

```

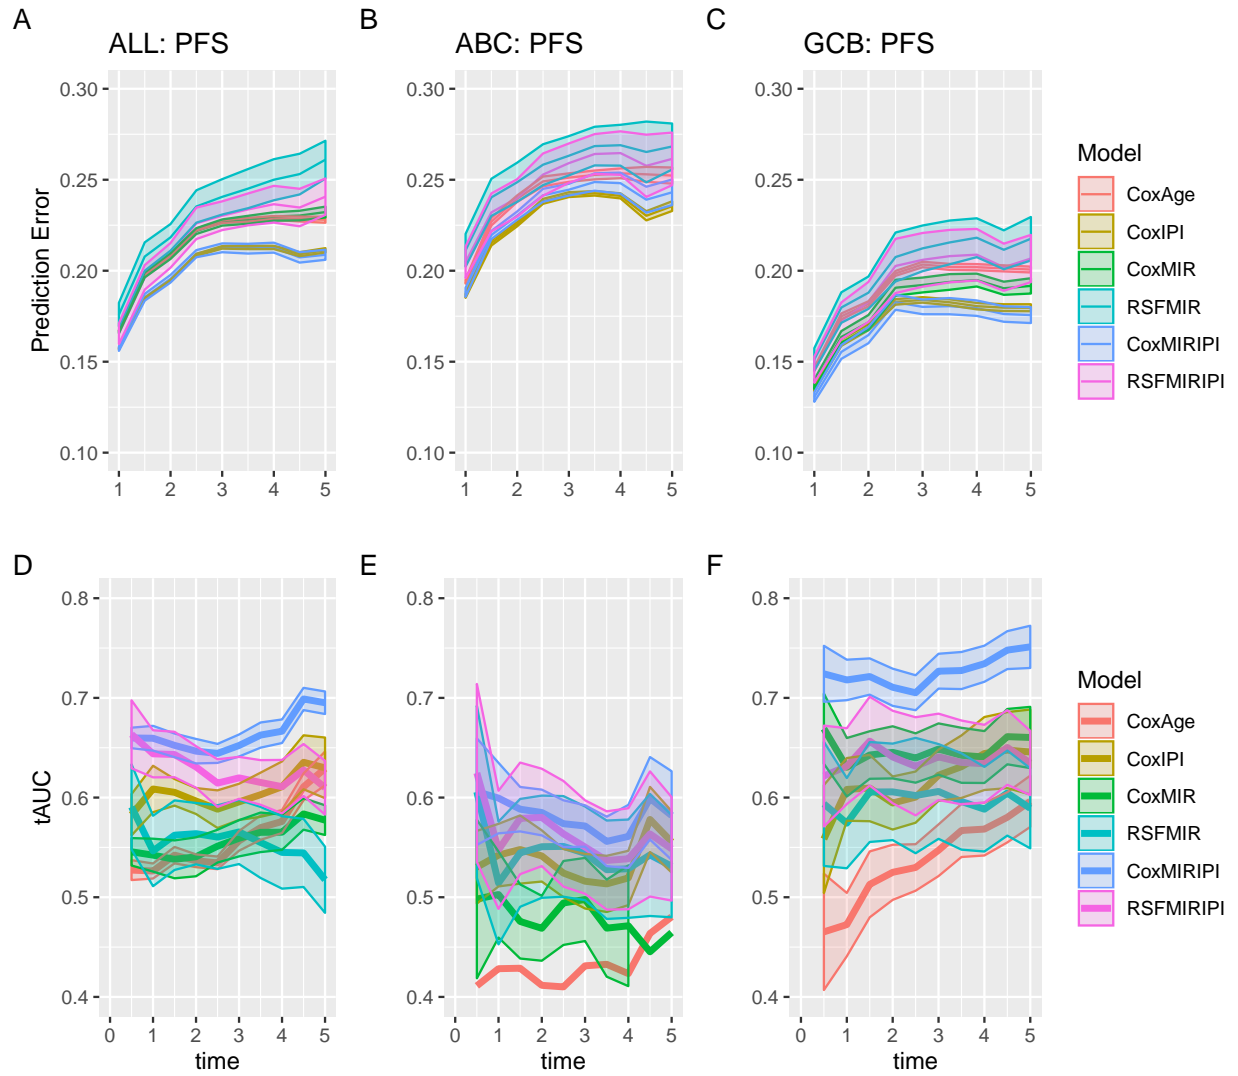

plot(fig2)

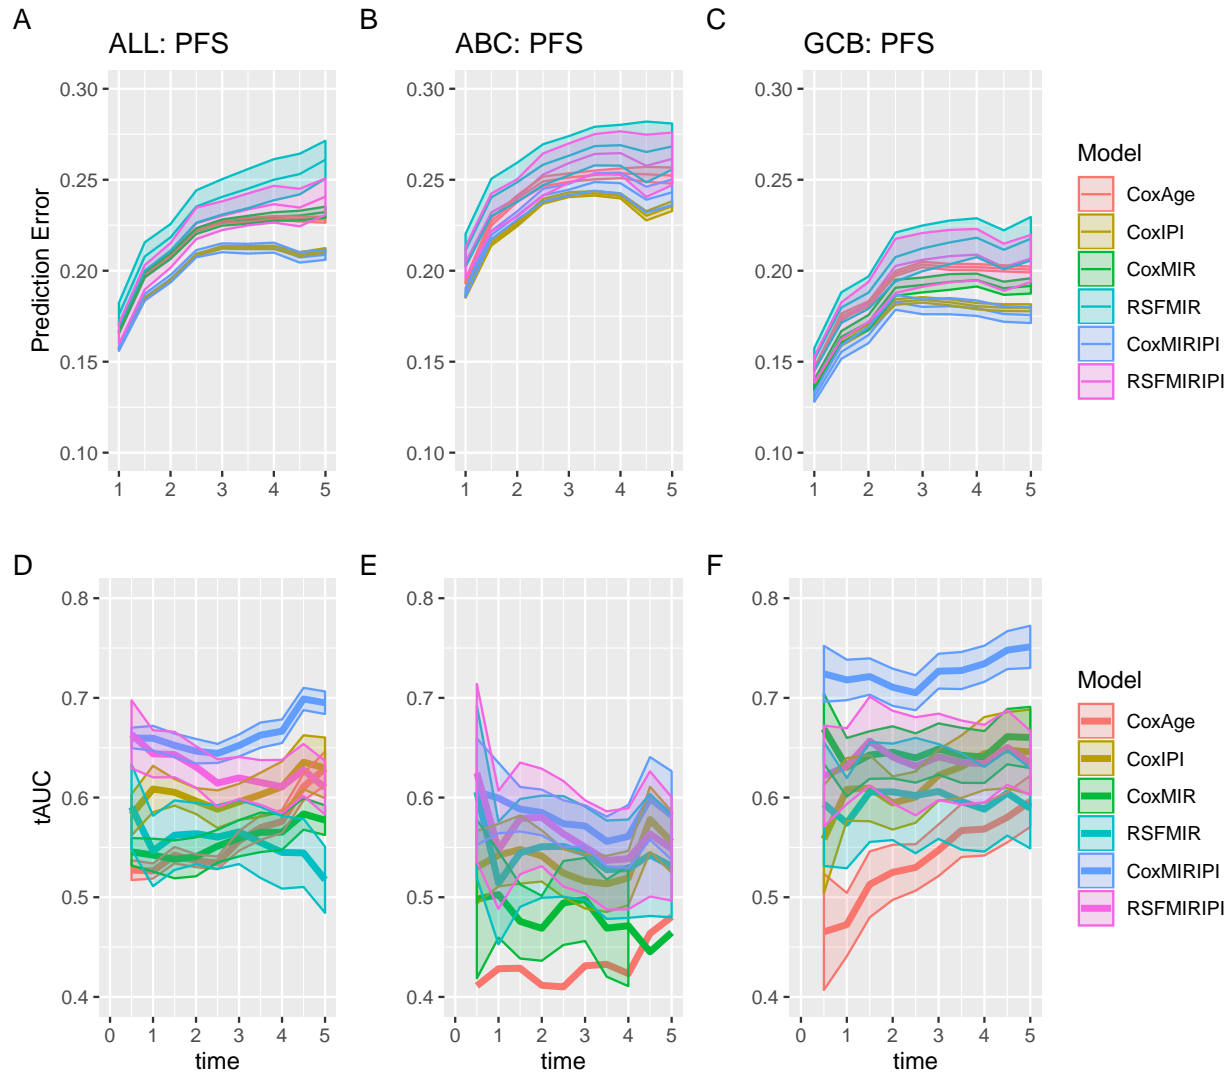

```
scoresMIR <- do.call(cbind, lapply(results.cv.reps,
                                function(x) x[["scores"]][["GCB"]][["scoreCoxMIR"]]))
scoresMIRIPI <- do.call(cbind, lapply(results.cv.reps,
                                    function(x) x[["scores"]][["GCB"]][["scoreCoxMIRIPI"]]))

scores.gcb <- data.frame("coxMIR" = rowMeans(scoresMIR),
                        "coxMIRIPI" = rowMeans(scoresMIRIPI))
```

## Kaplan meier plots

We use the linear predictions from the Cox models in the crossvalidation to get a score for each individual. These are then split into tertiles and kaplan meier plots are made. Start by adding linear predictions to GCB subset and splitting into tertiles.

```
combined.metadata.gcb <- merge(combined.metadata, scores.gcb, by.x = "ID", by.y = 0)
combined.metadata.gcb$coxMIRClass <- cutFun(combined.metadata.gcb$coxMIR)
combined.metadata.gcb$coxMIRIPIClass <- cutFun(combined.metadata.gcb$coxMIRIPI)
combined.metadata.gcb$Response <- factor(combined.metadata.gcb$Response,
```

```
levels = levels(combined.metadata.gcb$Response)[c(1,3,4,2)]
```

Then do KM plots

```
fitMIROS <- with(combined.metadata.gcb, survfit(OS5~coxMIRClass))
fitMIRPFS <- with(combined.metadata.gcb, survfit(PFS5~coxMIRClass))

kmMIROS <- ggsurvplot(fitMIROS,
  risk.table = TRUE,
  data = combined.metadata.gcb,
  risk.table.y.text=FALSE,
  pval = TRUE,
  tables.height = 0.3,
  legend.labs = c("Low", "Intermediate", "High")) +
  ggtitle("MIR: OS")

kmMIRPFS <- ggsurvplot(fitMIRPFS,
  risk.table = TRUE,
  data = combined.metadata.gcb,
  risk.table.y.text=FALSE,
  pval = TRUE,
  tables.height = 0.3,
  legend.labs = c("Low", "Intermediate", "High")) +
  ggtitle("MIR: PFS")
```

Try with coxMIRIPI

```
fitMIRIPIOS <- with(combined.metadata.gcb, survfit(OS5~coxMIRIPIClass))
fitMIRIPIPFS <- with(combined.metadata.gcb, survfit(PFS5~coxMIRIPIClass))

kmMIRIPIOS <- ggsurvplot(fitMIRIPIOS,
  risk.table = TRUE,
  data = combined.metadata.gcb,
  risk.table.y.text=FALSE,
  pval = TRUE,
  tables.height = 0.3,
  legend.labs = c("Low", "Intermediate", "High")) +
  ggtitle("MIR+IPI: OS")

kmMIRIPIPFS <- ggsurvplot(fitMIRIPIPFS,
  data = combined.metadata.gcb,
  risk.table = TRUE,
  risk.table.y.text=FALSE,
  pval = TRUE,
  tables.height = 0.3,
  legend.labs = c("Low", "Intermediate", "High")) +
  ggtitle("MIR+IPI: PFS")
```

Create side-by-side plots

```
kmMIROS <- kmMIROS + labs(tag = "A")
kmMIRIPIOS <- kmMIRIPIOS + labs(tag = "B")
kmMIRPFS <- kmMIRPFS + labs(tag = "A")
kmMIRIPIPFS <- kmMIRIPIPFS + labs(tag = "B")
```

```
arrange_ggsurvplots(list(kmMIROS, kmMIRIPIOS))
```

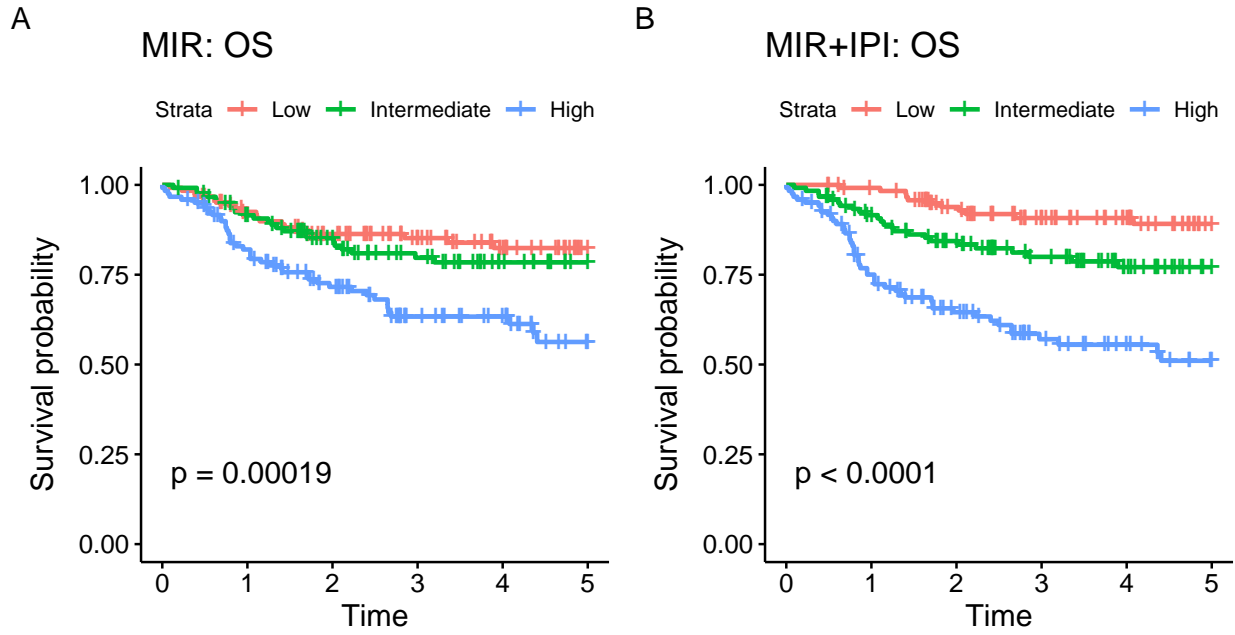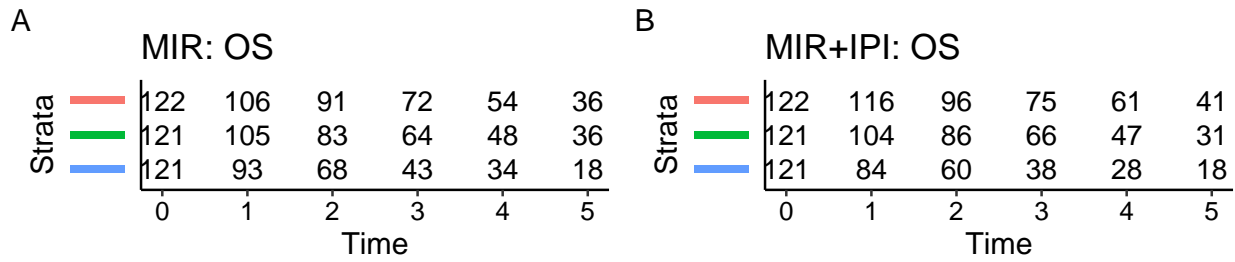

```
fig3 <- arrange_ggsurvplots(list(kmMIRPFS, kmMIRIPIPFS))
```



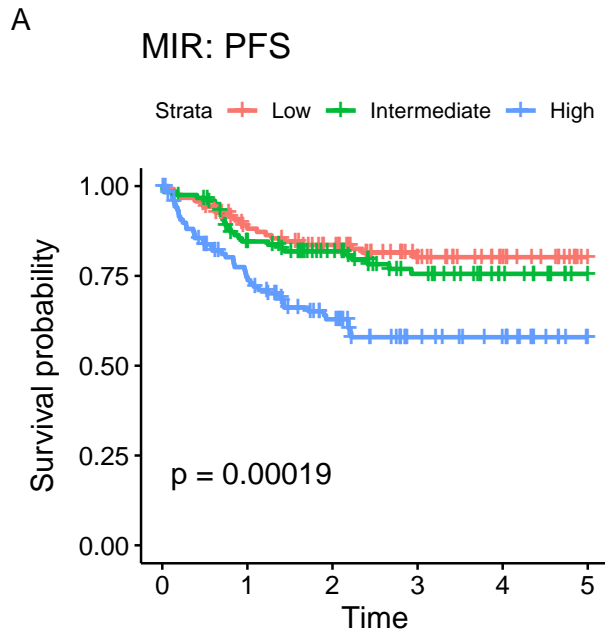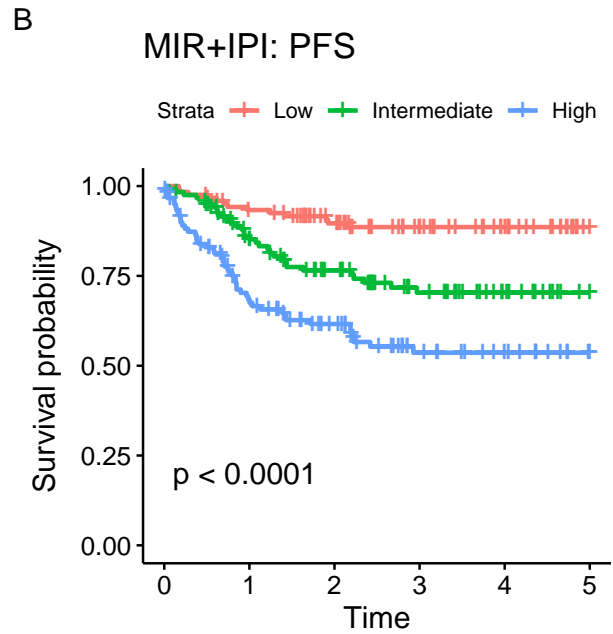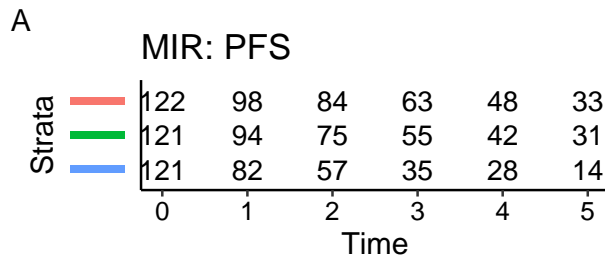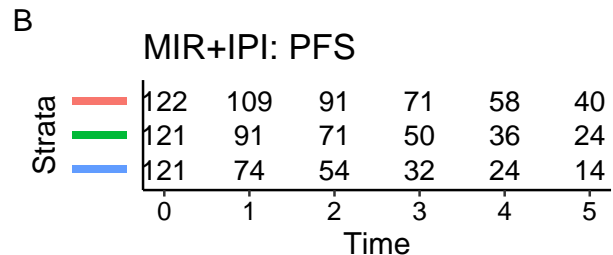

### Stratify survival plots by study

```

kmMIROS_study <- ggsurvplot_facet(fitMIROS,
                                data = combined.metadata.gcb,
                                pval = TRUE,
                                facet.by = "study") + ggtitle("MIR: OS")

kmMIRPFS_study <- ggsurvplot_facet(fitMIRPFS,
                                   data = combined.metadata.gcb,
                                   pval = TRUE,
                                   facet.by = "study") + ggtitle("MIR: PFS")

kmMIRIPIOS_study <- ggsurvplot_facet(fitMIRIPIOS,
                                     data = combined.metadata.gcb,
                                     pval = TRUE,
                                     facet.by = "study") + ggtitle("MIR+IPI: OS")

kmMIRIPIPFS_study <- ggsurvplot_facet(fitMIRIPIPFS,
                                       data = combined.metadata.gcb,
                                       pval = TRUE,
                                       facet.by = "study") + ggtitle("MIR+IPI: PFS")

kmMIROS_study

```

# MIR: OS

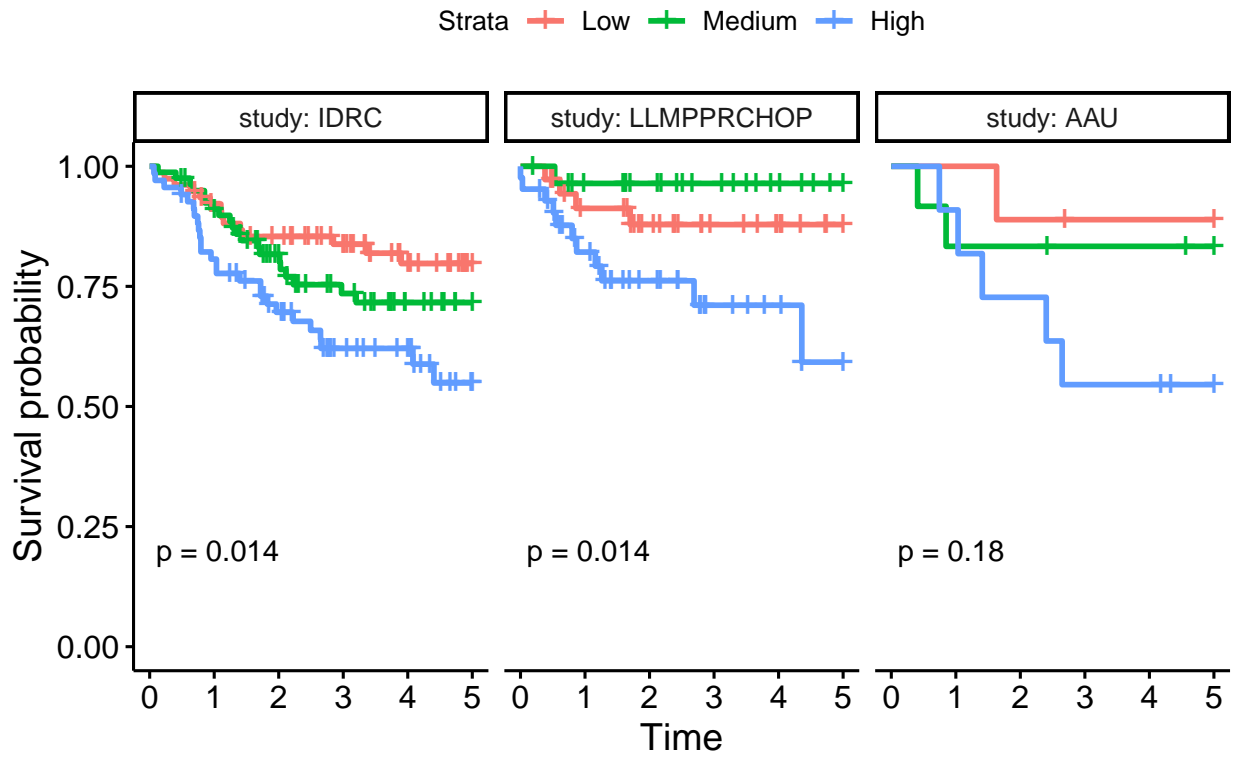

kmMIRPFS\_study

# MIR: PFS

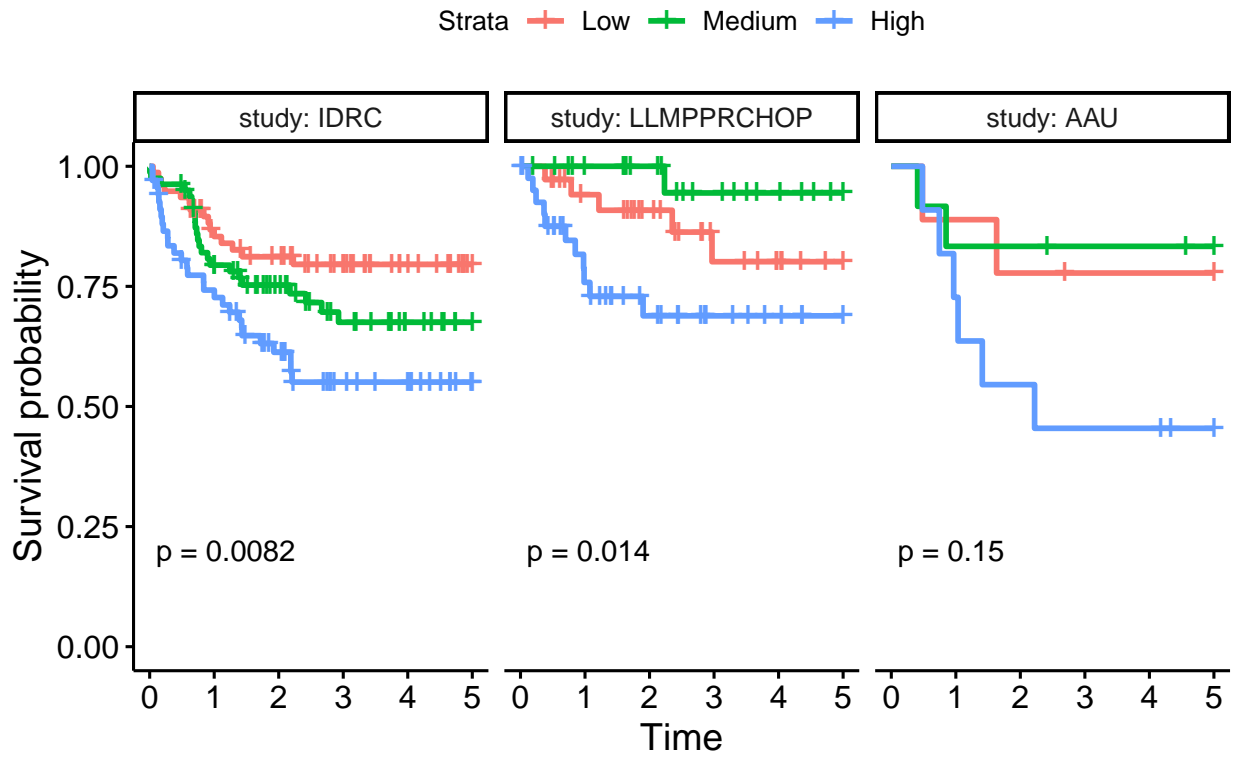

kmMIRIPIOS\_study

# MIR+IPI: OS

Strata Low Medium High

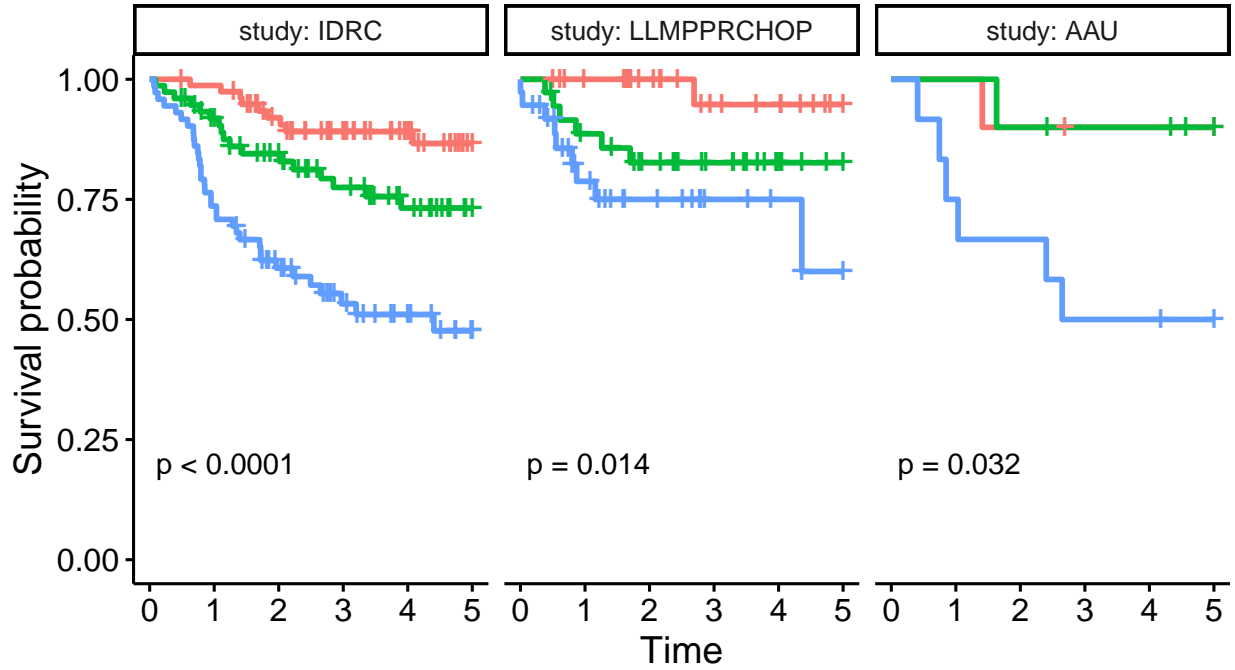

kmMIRIPIFS\_study

## MIR+IPI: PFS

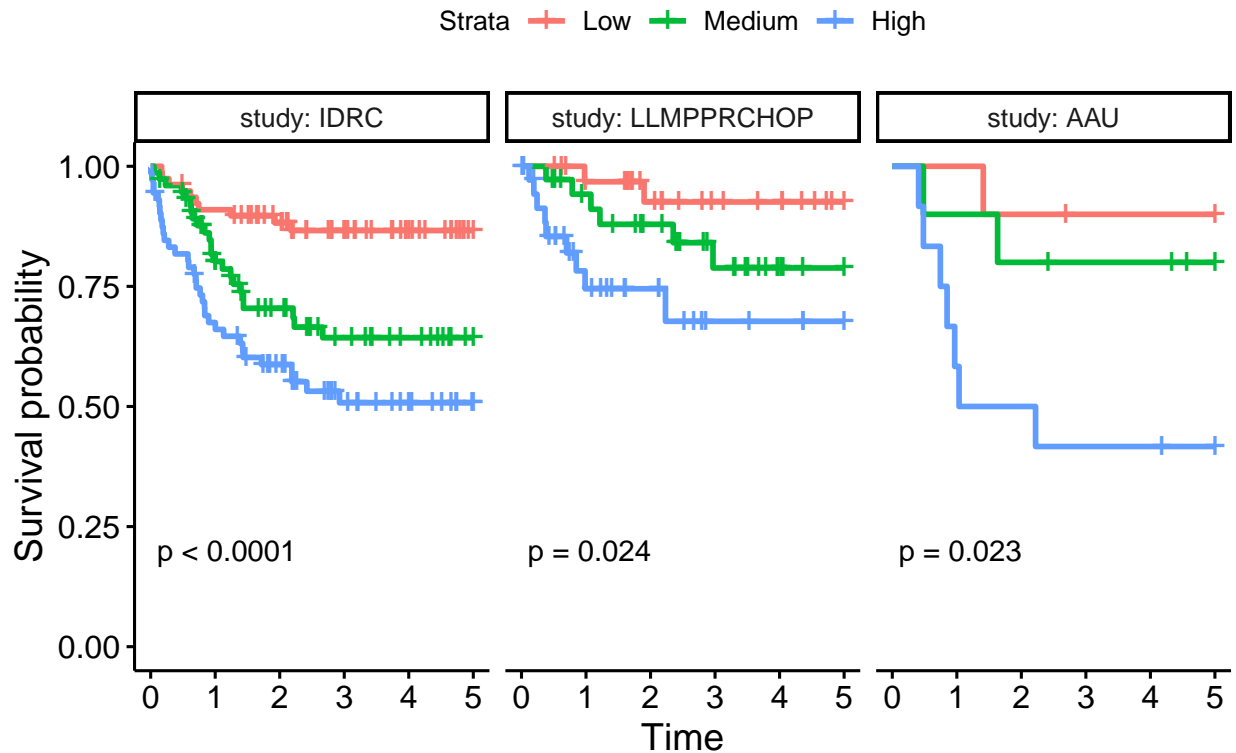

## Compare with clinical response

Test for significant difference in prognostic score across clinical response groups and store p-values.

```
lmMIR <- lm(coxMIR~Response, data = combined.metadata.gcb)
lmMIRIPI <- lm(coxMIRIPI~Response, data = combined.metadata.gcb)
summary(lmMIR)

##
## Call:
## lm(formula = coxMIR ~ Response, data = combined.metadata.gcb)
##
## Residuals:
##      Min       1Q   Median       3Q      Max
## -1.28027 -0.36027 -0.03468  0.32147  1.95475
##
## Coefficients:
##              Estimate Std. Error t value Pr(>|t|)
## (Intercept) -0.07897    0.03293  -2.398  0.01703 *
## ResponsePR   0.25209    0.08176   3.083  0.00223 **
## ResponseSD   0.17395    0.15326   1.135  0.25723
## ResponsePD   0.49665    0.12999   3.821  0.00016 ***
## ---
## Signif. codes:  0 '***' 0.001 '**' 0.01 '*' 0.05 '.' 0.1 ' ' 1
##
## Residual standard error: 0.5185 on 321 degrees of freedom
```

```
## (39 observations deleted due to missingness)
## Multiple R-squared: 0.06532, Adjusted R-squared: 0.05658
## F-statistic: 7.477 on 3 and 321 DF, p-value: 7.472e-05
```

```
summary(lmMIRIPI)
```

```
##
## Call:
## lm(formula = coxMIRIPI ~ Response, data = combined.metadata.gcb)
##
## Residuals:
##      Min       1Q   Median       3Q      Max
## -1.67992 -0.65568  0.06101  0.57496  2.22702
##
## Coefficients:
##              Estimate Std. Error t value Pr(>|t|)
## (Intercept)  -0.1719     0.0482  -3.567 0.000417 ***
## ResponsePR    0.5955     0.1197   4.975 1.06e-06 ***
## ResponseSD    0.5421     0.2244   2.416 0.016240 *
## ResponsePD    0.7858     0.1903   4.129 4.65e-05 ***
## ---
## Signif. codes:  0 '***' 0.001 '**' 0.01 '*' 0.05 '.' 0.1 ' ' 1
##
## Residual standard error: 0.7591 on 321 degrees of freedom
## (39 observations deleted due to missingness)
## Multiple R-squared: 0.1141, Adjusted R-squared: 0.1058
## F-statistic: 13.78 on 3 and 321 DF, p-value: 1.775e-08
```

```
## Get p-values
```

```
pMIR <- ifelse(anova(lmMIR)$`Pr(>F)`[1] < 0.001,
              "p < 0.001",
              paste("p =", round(anova(lmMIR)$`Pr(>F)`[1]),3))

pMIRIPI <- ifelse(anova(lmMIRIPI)$`Pr(>F)`[1] < 0.001,
                 "p < 0.001",
                 paste("p =", round(anova(lmMIRIPI)$`Pr(>F)`[1]),3))
```

Create boxplots of clinical response vs prognostic score.

```
## Create Labels for x-axis
```

```
labls <- c("Complete Response", "Partial Response", "Stable Disease", "Progressive Disease")
labls <- paste0(labls, "(N =", table(combined.metadata.gcb$Response), ")")
```

```
crMIR <- ggplot(subset(combined.metadata.gcb, is.na(Response) == FALSE),
               aes(x = Response, y = coxMIR, fill = Response)) +
  geom_boxplot() +
  ggtitle("MIR: Clinical Response") +
  scale_fill_discrete(labels = labls) +
  annotate("text", label = pMIR, x = 3, y = 1.9)

crMIRIPI <- ggplot(subset(combined.metadata.gcb, is.na(Response) == FALSE),
                  aes(x = Response, y = coxMIRIPI, fill = Response)) +
  geom_boxplot() +
  ggtitle("MIR+IPI: Clinical Response") +
```

```
scale_fill_discrete(labels = labls) +  
annotate("text", label = pMIRIPI, x = 3, y = 1.9)
```

crMIR

### MIR: Clinical Response

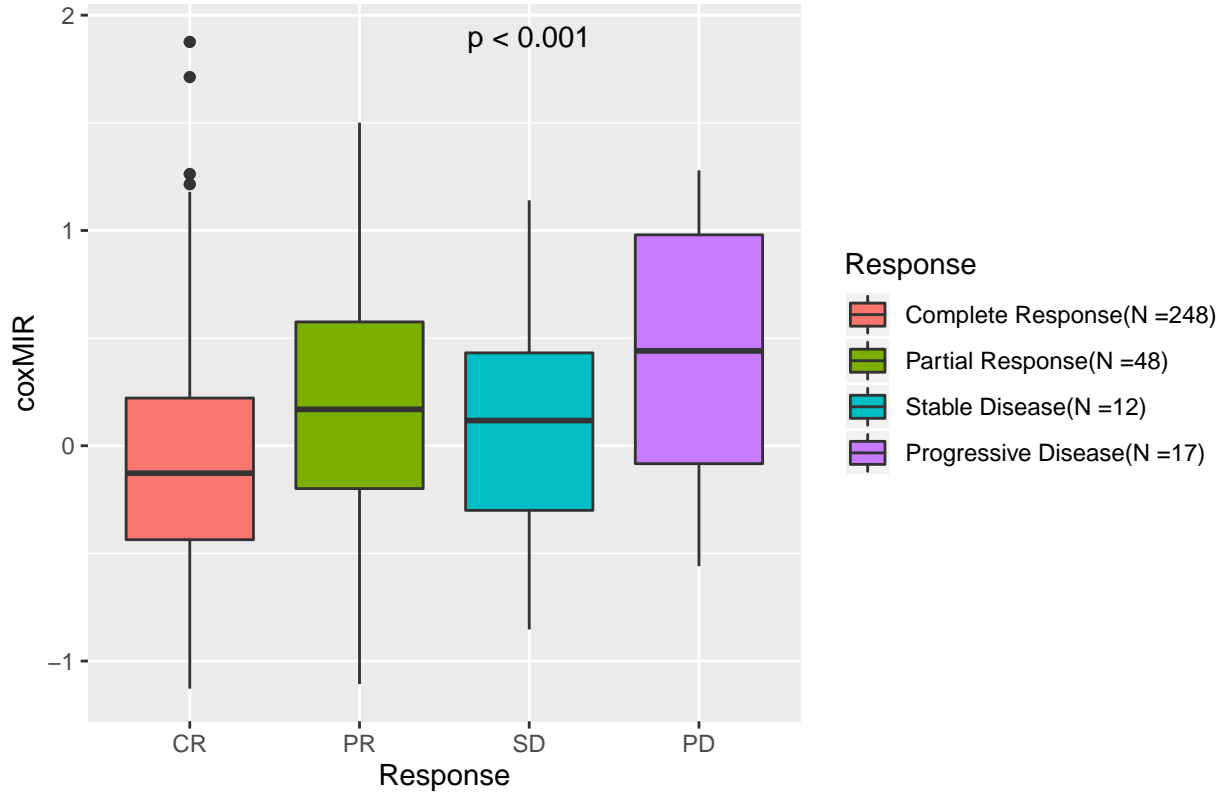

crMIRIPI

## MIR+IPI: Clinical Response

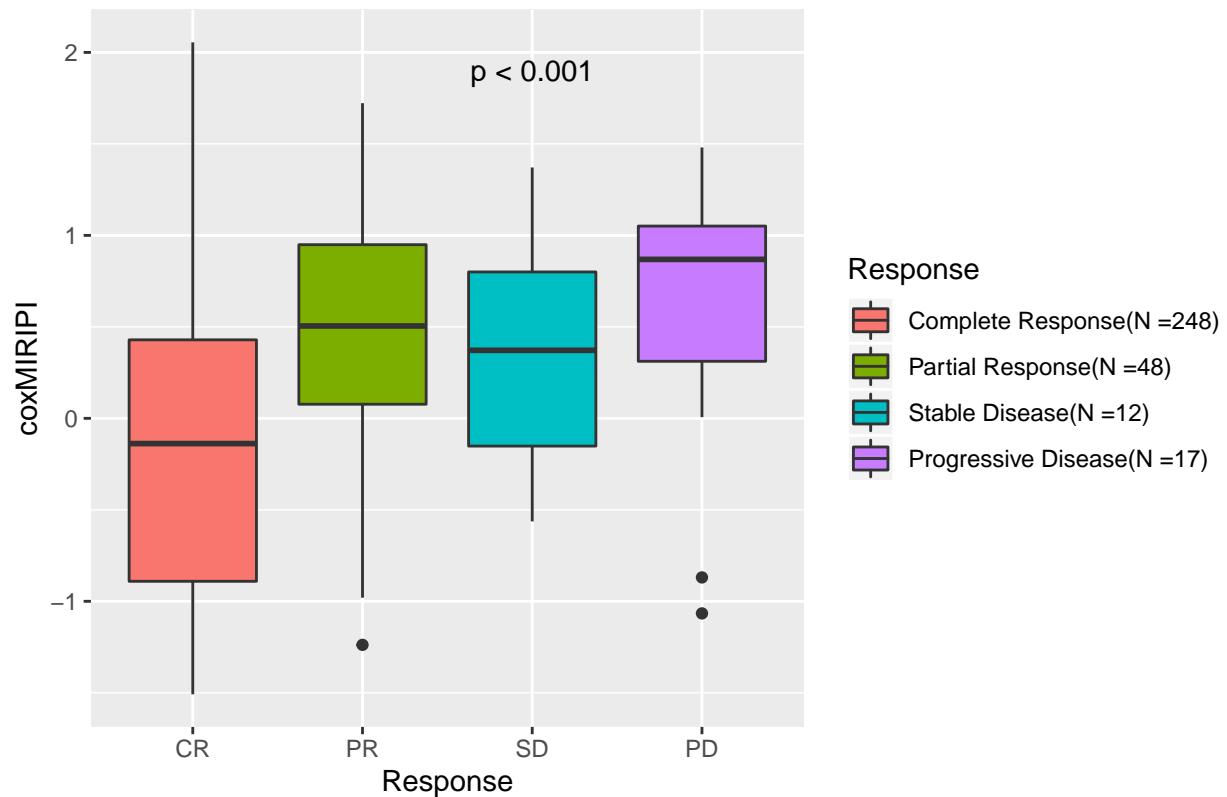

Combined side-by-side plot

```
crMIR <- crMIR + scale_fill_discrete(guide = FALSE) + ylim(c(-1.5, 2.2)) + labs(tag = "A")
```

```
## Scale for 'fill' is already present. Adding another scale for 'fill',  
## which will replace the existing scale.
```

```
crMIRIPI <- crMIRIPI + ylim(c(-1.5, 2.2)) + labs(tag = "B")
```

```
fig4 <- grid.arrange(crMIR, crMIRIPI, ncol = 2, widths = c(1,1.8))
```

```
## Warning: Removed 1 rows containing non-finite values (stat_boxplot).
```



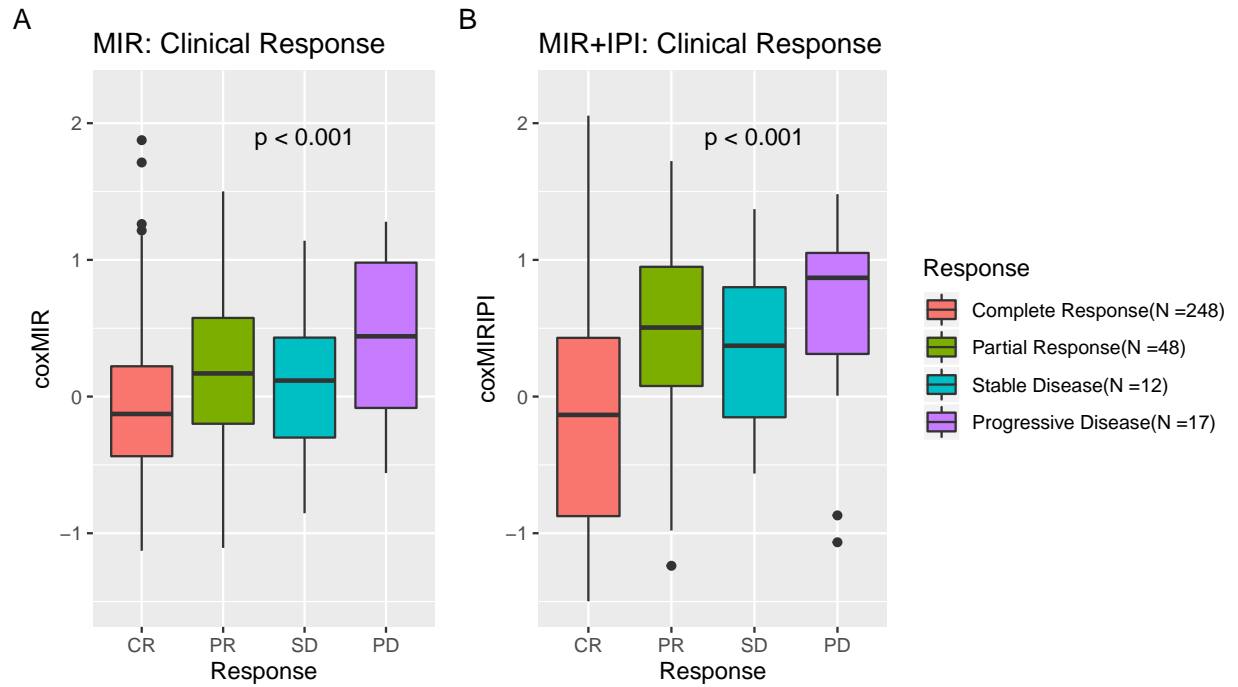

`plot(fig4)`

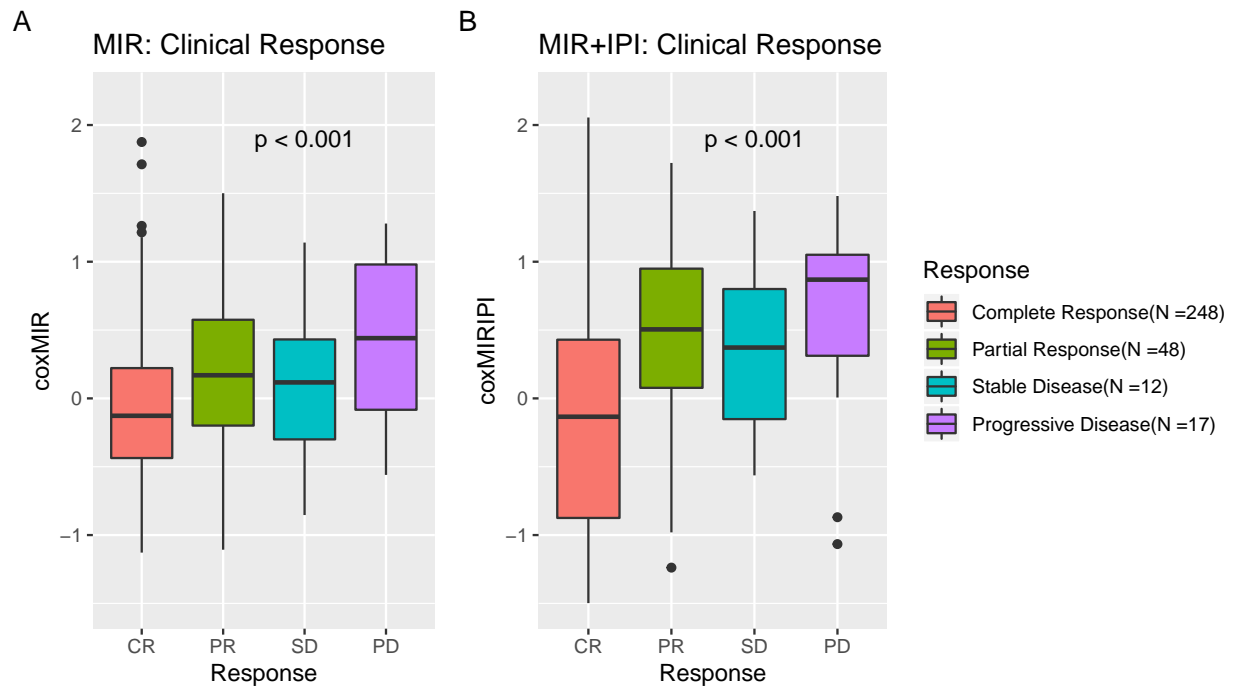

## Train final classifier

Based on results above we train a classifier with MIR probes and IPI in the full GCB subset of data Build dataset

```

cox.data <- data.frame(t(combined.data.combat[probes, ]))
names(cox.data) <- probes
cox.data <- cbind(combined.metadata, cox.data)
cox.data.gcb <- subset(cox.data, ABCGCB == "GCB")

```

Do the univariate cox regression for each probe

```

cox.gcb.PFS <- uni.multi.cox(cox.data.gcb, probes, outcome = "PFS")
kable(cox.gcb.PFS$combined.results)

```

|              | MIR        | uni.HR | uni.conf    | uni.p | multi.HR    | multi.conf  | multi.p |
|--------------|------------|--------|-------------|-------|-------------|-------------|---------|
| 238225_at    | MIR146A    | 0.92   | (0.49;1.71) | 0.792 | (0.61;2.14) | (0.61;2.14) | 0.669   |
| 232504_at    | MIR146A    | 0.69   | (0.58;0.81) | 0.000 | (0.65;1)    | (0.65;1)    | 0.047   |
| 229437_at    | MIR155     | 0.75   | (0.66;0.85) | 0.000 | (0.73;1.04) | (0.73;1.04) | 0.120   |
| 220990_s_at  | MIR21      | 0.74   | (0.62;0.88) | 0.001 | (0.79;1.39) | (0.79;1.39) | 0.760   |
| 229417_at    | MIR21      | 0.90   | (0.55;1.46) | 0.666 | (0.54;1.42) | (0.54;1.42) | 0.591   |
| 235317_at    | MIR23A     | 0.98   | (0.64;1.5)  | 0.932 | (0.8;2.29)  | (0.8;2.29)  | 0.257   |
| 1555847_a_at | MIR23A     | 0.76   | (0.59;0.97) | 0.025 | (0.61;1.23) | (0.61;1.23) | 0.418   |
| 235571_at    | MIR34A     | 0.54   | (0.38;0.77) | 0.001 | (0.44;1.02) | (0.44;1.02) | 0.064   |
| 1557342_a_at | hsa-let-7b | 1.02   | (0.57;1.84) | 0.945 | (0.46;1.51) | (0.46;1.51) | 0.549   |
| 241464_s_at  | hsa-let-7b | 0.73   | (0.33;1.58) | 0.422 | (0.35;1.62) | (0.35;1.62) | 0.464   |
| 227488_at    | MIR503     | 1.11   | (0.62;1.98) | 0.726 | (0.57;1.93) | (0.57;1.93) | 0.875   |

```

## Probes that were significant in univariate cox for PFS
sig.probes <- row.names(cox.gcb.PFS$combined.results[cox.gcb.PFS$combined.results$uni.p<0.05,])

## Pick out necessary columns from GCB subset of data, and recode IPI
cox.final.data <- cox.data.gcb[, c("PFS", "IPI", sig.probes)]
cox.final.data$IPI <- factor(ifelse(cox.final.data$IPI %in% c("0", "1"), "0-1", "2-5"))

## Fit model and print results
cox.final <- coxph(PFS~., data = cox.final.data)
kable(summary(cox.final)$conf.int)

```

|              | exp(coef) | exp(-coef) | lower .95 | upper .95 |
|--------------|-----------|------------|-----------|-----------|
| IPI2-5       | 3.3345365 | 0.2998918  | 1.9559374 | 5.684810  |
| 232504_at    | 0.8568170 | 1.1671104  | 0.6916290 | 1.061458  |
| 229437_at    | 0.8676394 | 1.1525525  | 0.7308004 | 1.030101  |
| 220990_s_at  | 0.9952559 | 1.0047667  | 0.7652018 | 1.294475  |
| 1555847_a_at | 0.9578975 | 1.0439531  | 0.7233349 | 1.268524  |
| 235571_at    | 0.7759503 | 1.2887424  | 0.5220012 | 1.153443  |

Prepare figures for publication

```

## Single column 3.125" @ 600 dpi
## Double column 7" @ 600 dpi

tiff("../Output/figures/fig1.tiff", width = 1875, height = 1875, pointsize = 50, compression = "lzw")
  grid.draw(v1)
dev.off()

## pdf

```

```
## 2
```

```
ggsave("../Output/figures/fig2.tiff", plot = fig2, dpi = 600, width = 7.5, height = 7, compression = "lzw")
ggsave("../Output/figures/fig3.tiff", plot = fig3, dpi = 600, width = 7.5, height = 7, compression = "lzw")
ggsave("../Output/figures/fig4.tiff", plot = fig4, dpi = 600, width = 7.5, height = 3.5, compression = "lzw")
```

## Validate MIR expression with ddPCR

Read ddPCR data

```
ddPCR <- read_xlsx("../ExternalData/Cell lines/MiR_exp_ddPCR_correlation_analysis.xlsx")
```

```
## New names:
```

```
## * `` -> ...7
```

```
### Extract actual data and probeset to mir names
```

```
ddPCRdata <- ddPCR[,1:6]
```

```
ddPCRnames <- ddPCR[1:5,8:9]
```

Correlate U133+2 data to ddPCR data

```
Cors <- c()
```

```
for(i in 1:nrow(ddPCRnames)){
```

```
  Cors[i] <- cor(ddPCRdata[,ddPCRnames$miRNA[i]],
                bCellu133[ddPCRnames$Probeset[i],])
```

```
}
```

```
Cors <- data.frame("miR" = ddPCRnames$miRNA, "Correlation" = Cors)
```

```
kable(Cors, caption = "Correlation of ddPCR vs U133+2 expression")
```

Table 5: Correlation of ddPCR vs U133+2 expression

| miR      | Correlation |
|----------|-------------|
| miR-146a | 0.8969691   |
| miR-155  | 0.9429651   |
| miR-21   | 0.7759889   |
| miR-27a  | 0.6526918   |
| miR-34a  | 0.7322472   |

Create figure

```
p <- list()
```

```
ddPCRdata <- as.data.frame(ddPCRdata)
```

```
for(i in 1:nrow(ddPCRnames)){
```

```
  mirName <- as.character(ddPCRnames$miRNA[i])
```

```
  u133Name <- as.character(ddPCRnames$Probeset[i])
```

```
  regression <- lm(bCellu133[u133Name,] ~ ddPCRdata[,mirName])
```

```
  tempPlot <- data.frame("miR" = ddPCRdata[,ddPCRnames$miRNA[i]],
                        "u133" = bCellu133[ddPCRnames$Probeset[i],])
```

```
  p[[i]] <- ggplot(tempPlot, aes(x=mir, y=u133)) +
    geom_point(shape=1) +
    geom_smooth(method=lm) +
```

```

xlab(mirName) +
ylab(u133Name) +
ggtitle(mirName) +
annotate("text", x = -Inf, y = -Inf, hjust = -1, vjust = -1,
        label = paste("R^2 = ", round(summary(regression)$r.squared, 2)))
}

grid.arrange(grobs = p, ncol = 3)

```

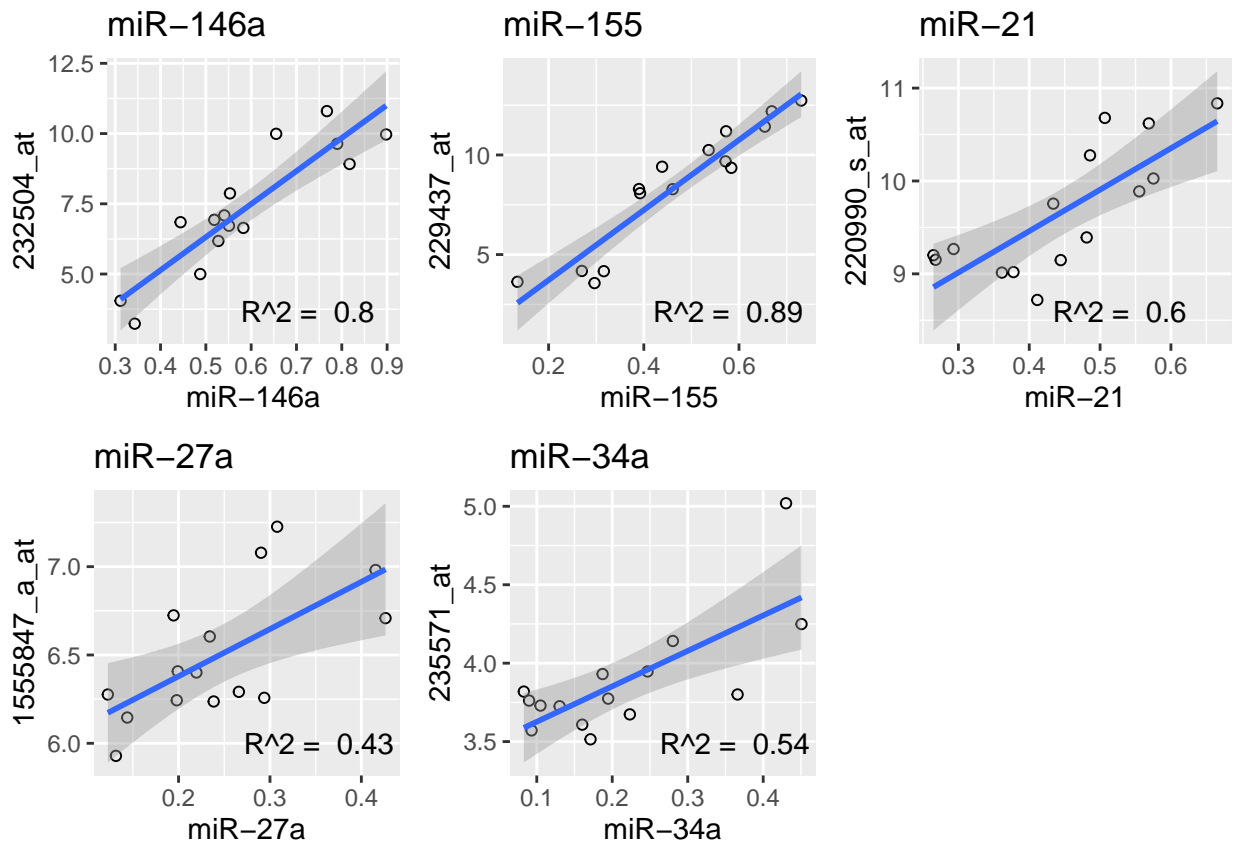

Supplement: 12885_2020_6643_MOESM2_ESM.pdf [file 12885_2020_6643_MOESM2_ESM.pdf]
